# Endogenous protein tagging in medaka using a simplified CRISPR/Cas9 knock-in approach

Ali Seleit<sup>1,\*</sup>, Alexander Aulehla<sup>1</sup>, Alexandre Paix<sup>1,\*</sup>

1 Developmental Biology Unit, European Molecular Biology Laboratory, Heidelberg, Meyerhofstrasse 1, 69117, Heidelberg, Germany.

\* Authors for correspondence: [ali.seleit@embl.de](mailto:ali.seleit@embl.de) and [alexandre.paix@embl.de](mailto:alexandre.paix@embl.de)

ORCID ID: Ali Seleit (0000-0002-8144-2286), Alexander Aulehla (0000-0003-3487-9239), Alexandre Paix (0000-0002-8080-7546)

Keywords: CRISPR, HDR, medaka, fusion-proteins, WGS, cloning-free, Pcna, KI

## Abstract

The CRISPR/Cas9 system has been used to generate fluorescently labelled fusion proteins by homology directed repair in a variety of species. Despite its revolutionary success, there remains an urgent need for increased simplicity and efficiency of genome editing in research organisms. Here, we establish a simplified, highly efficient and precise strategy for CRISPR/Cas9 mediated endogenous protein tagging in medaka (*Oryzias latipes*). We use a cloning-free approach that relies on PCR amplified donor fragments containing the fluorescent reporter sequences flanked by short homology arms (30-40bp), a synthetic sgRNA and streptavidin tagged Cas9. We generate six novel knock-in lines with high efficiency of F0 targeting and germline transmission. Whole Genome Sequencing (WGS) results reveal single-copy integration events only at the targeted *loci*. We provide an initial characterization of these fusion-protein lines, significantly expanding the repertoire of genetic tools available in medaka. In particular, we show that the *mScarlet-pcna* knock-in line has the potential to serve as an organismal-wide label for proliferative zones and an endogenous cell cycle reporter.

## 37 Introduction

38

39 The advent of gene editing tools (Wang et al., 2016, Jinek et al., 2012, Cong et al.,  
40 2013) in conjunction with the expansion of sequenced genomes and engineered  
41 fluorescent proteins (Chudakov et al., 2010, Shaner et al., 2013, Bindels et al., 2017)  
42 has revolutionized the ability to generate endogenous fusion protein Knock-In (KI)  
43 lines in a growing number of organisms (Paix et al., 2015, Paix et al., 2017b, Paix et  
44 al., 2017a, Gratz et al., 2014, Kanca et al., 2019, Wierson et al., 2020, Gutierrez-Triana  
45 et al., 2018, Hisano et al., 2015, Auer and Del Bene, 2014, Yoshimi et al., 2016, Yao  
46 et al., 2017, Cong et al., 2013, Dickinson et al., 2015, Leonetti et al., 2016). These  
47 molecular markers expressed at physiological levels are central to our understanding  
48 of cellular and tissue level dynamics during embryonic development (Gibson et al.,  
49 2013). To this end researchers have utilized the *Streptococcus pyogenes* CRISPR  
50 associated protein 9 (Cas9) and a programmed associated single-guide RNA (sgRNA)  
51 to introduce a Double Strand Break (DSB) at a pre-defined genomic location (Jinek et  
52 al., 2012, Cong et al., 2013). Cell DNA repair mechanisms are triggered by the DSB  
53 and it has been shown that providing DNA repair donors with homology arms that  
54 match those of the targeted *locus* can lead to integration of the donor constructs  
55 containing fluorescent reporter sequences in the genome by the process of Homology  
56 Directed Repair (HDR) (Danner et al., 2017, Jasin and Haber, 2016, Ceccaldi et al.,  
57 2016, Hoshijima et al., 2016, Shin et al., 2014, Zu et al., 2013). Despite its success,  
58 HDR mediated precise single-copy KI efficiencies in vertebrate models can still be low  
59 and the process of generating KI lines remains cumbersome and time-consuming.  
60 Recent reports have improved the methodology by the usage of 5' biotinylated long  
61 homology arms that prevent concatemerization of the injected dsDNA (Gutierrez-  
62 Triana et al., 2018) or by linking the repair donor to the Cas9 protein (Gu et al., 2018).  
63 In addition, repair donors with shorter homology arms in combination with *in vivo*  
64 linearization of the donor plasmid have been shown to mediate efficient Knock-Ins in  
65 Zebrafish and in mammalian cells (Wierson et al., 2020, Hisano et al., 2015, Cristea et  
66 al., 2013, Auer et al., 2014, Ota et al., 2014, Shin et al., 2014).

67

68 In this work we establish a simplified, highly efficient and precise strategy for  
69 CRISPR/Cas9 mediated endogenous protein tagging in medaka (*Oryzias latipes*). Our  
70 approach relies on the use of biotinylated PCR amplified donor fragments that contain  
71 the fluorescent reporter sequences flanked by short homology arms (30-40bp), by-  
72 passing the need for cloning or *in vivo* linearisation. We use this approach to generate  
73 and characterize a series of novel knock-in lines in medaka fish (Table 1 and Table  
74 S1). By utilizing Whole Genome Sequencing (WGS) with high coverage in  
75 conjunction with Sanger sequencing of edited *loci*, we provide strong evidence for  
76 precise single-copy integration events only at the desired *loci*. In addition to generating  
77 an endogenous ubiquitous nuclear label and novel tissue specific reporters, the knock-  
78 in lines allow us to record cellular processes, such as intracellular trafficking and stress  
79 granule formation in 4D during embryonic development, significantly expanding the  
80 genetic toolkit available in medaka. Finally, we provide proof of principle evidence

81 that the endogenous *mScarlet-pcna* knock-in we generate serves as a *bona fide*  
82 proliferative cell label and an endogenous cell cycle reporter, with broad application  
83 potential in a vertebrate model system.

84

85

## 86 **Results**

87

### 88 **A simplified, highly efficient strategy for CRISPR/Cas9 mediated fluorescent** 89 **protein knock-ins in medaka**

90

91 To simplify the process of generating fluorescent protein knock-ins in teleosts we  
92 utilized PCR amplified dsDNA donors with short homology arms (30-40bp).  
93 Biotinylated 5' ends were used to prevent *in vivo* concatemerization (Gutierrez-Triana  
94 et al., 2018, Auer et al., 2014, Winkler et al., 1991) and a Strepavidin tagged Cas9  
95 (Cas9-mSA) was used to increase binding affinity to the biotinylated donor constructs  
96 (Gu et al., 2018). This approach by-passes the need for cloning, as homology arms are  
97 already included in the amplification primers, and the use of a second gRNA for *in vivo*  
98 plasmid linearisation (Hoshijima et al., 2016, Shin et al., 2014, Zu et al., 2013). The  
99 three-component mix; biotinylated PCR amplified dsDNA donors, synthetic sgRNA  
100 and Cas9-mSA mRNA (Tables S2/S3/S4/S5) was injected into 1 cell-stage medaka  
101 embryos (Figure 1 and Figure S1, for a detailed protocol see Files S1 and S2). We  
102 targeted a list of seven genes with a variety of fluorescent proteins (Figure 1, Figure  
103 S1, Table 1 and Table S4), both N and C terminus tags were attempted (a list of all  
104 genomic *loci* targeted can be found in Table S1). Targeting efficiency in F0 ranged  
105 from 11% to 59% of embryos showing mosaic expression (Table 1 and Table S1).  
106 Control injections with the *actb* sgRNA, Cas9-mSA mRNA and the donor eGFP  
107 construct without homology arms showed no evidence of eGFP positive cell clones in  
108 F0 (Table S1), while the same construct with homology arms resulted in 39% of  
109 surviving injected embryos showing mosaic expression of eGFP (Table 1 and Table  
110 S1). The germline transmission efficiency of fluorescent F0 fish ranged from 25% to  
111 100% for the different targeted *loci* (Table 1 and Table S1). For F0s with germline  
112 transmission the range of positive F1 embryos obtained was between 6.6% and 50%.  
113 Using this method we were able to establish six stable knock-in lines. Importantly, a  
114 single injection round was sufficient to generate a knock-in line for most targeted *loci*  
115 (5/6; Table 1 and Tables S1/S6). As previously reported, the *actb-eGFP* tag was  
116 embryonic lethal (Gutierrez-Triana et al., 2018) and we could not obtain a knock-in  
117 line for that *locus*. Combined, our results provide evidence that highly efficient  
118 targeting of endogenous *loci* with large inserts (~800bp) is possible in medaka using  
119 our simplified KI approach (Figure 1 and Figure S1). In addition to being highly  
120 efficient, our method is rapid and simple-to-implement, as it relies on PCR  
121 amplification of the linear donor construct and hence alleviates the need for any  
122 additional cloning or *in vivo* plasmid linearization (Figure S1).

123

124

## 125 **Precise, single copy Knock-Ins of fluorescent protein reporters**

126

127 We next assessed the specificity and precision of the approach. It is possible that either  
128 concatemerization of inserts or off-target integrations could occur after foreign DNA  
129 delivery and a CRISPR/Cas9 mediated DSBs (Gutierrez-Triana et al., 2018, Doench et  
130 al., 2016, Fu et al., 2013, Paix et al., 2017a, Won and Dawid, 2017, Yan et al., 2013,  
131 Hackett et al., 2007, Wierson et al., 2020, Wierson et al., 2019). To identify off-target  
132 insertions genome-wide and verify single-copy integration we performed next  
133 generation Whole Genome Sequencing (WGS) with high coverage (for details of  
134 WGS, see material and methods) on three knock-in lines (Figure 1B-D); *eGFP-cbx1b*,  
135 *mScarlet-pcna* and *mNeonGreen-myosinhc*. For the *eGFP-cbx1b* KI line, we could  
136 only identify paired-end *eGFP* reads anchored to the endogenous *cbx1b* locus and  
137 nowhere else in the genome (Figure S2). Likewise, in the *mScarlet-pcna* line, *mScarlet*  
138 reads only mapped to the endogenous *pcna* locus (Figure S2). For the *mNeonGreen-*  
139 *myosinhc* line, *mNeonGreen* sequences mapped to the *myosinhc* locus (Figure S2), but  
140 paired-end analysis yielded a second, weakly supported partial insertion of  
141 *mNeonGreen* at an intronic region in the *edf1* gene. We were not able to confirm the  
142 latter insertion by subsequent PCR and hence it remains unclear whether this a false  
143 positive prediction or a mosaic insertion of very low frequency. Combined, the whole  
144 genome sequencing results therefore provide strong evidence that the method we report  
145 results in single-copy insertions only at the targeted locus. In addition to WGS,  
146 genotyping F1 adults followed by Sanger sequencing confirmed the generation of  
147 single-copy in-frame fusion proteins in the *eGFP-cbx1b*, *mScarlet-pcna* and  
148 *mNeonGreen-myosin-hc* lines (Figure S2). In 5/6 cases homology directed repair  
149 (HDR) resulted in precise, scarless integrations (Figure S2), while in one case we could  
150 detect a partial duplication (21 base pairs) within the 5' homology arm, 22 base pairs  
151 upstream of the start codon (for details see Materials and Methods). Overall, the  
152 method we present here shows high precision and specificity enabling the rapid  
153 generation of endogenously tagged alleles in a vertebrate model.

154

## 155 **Visualisation of endogenous protein dynamics enables *in vivo* recording of** 156 **cellular processes in medaka**

157

158 As a proof of principle, we employed the simplified CRISPR/Cas9 strategy to generate  
159 a series of endogenous fusion protein knock-in medaka lines (Table 1 and Tables  
160 S1/S6, Figures S3/S4/S5/S6). Here, we provide an initial characterization of six of  
161 these novel knock-in lines that are made available to the community, to label cell  
162 compartments (nucleus), cell processes (cell cycle, intra-cellular trafficking, stress  
163 granule formation), cell-adhesion (adherens junctions) and specific cell types (muscle  
164 cells).

165

## 166 Ubiquitous nuclear marker

167

168 To generate a ubiquitously expressed nuclear label reporter line, we targeted the *cbx1b*  
169 (Chromobox protein homolog) locus with eGFP. Cbx1b is a member of the chromobox

170 DNA binding protein family and is a known component of heterochromatin that is  
171 expressed ubiquitously (Lomberk et al., 2006, Nielsen et al., 2001, Gilmore et al.,  
172 2016). Chromobox proteins are involved in several important functions within the  
173 nucleus, such as transcription, nuclear architecture, and DNA damage response  
174 (Luijsterburg et al., 2009). We generated an *eGFP-cbx1b* KI by targeting *eGFP* to the  
175 N-terminus of the *cbx1b* coding sequence in medaka. The resulting line expresses  
176 eGFP in all nuclei of every tissue examined, and serves as the first endogenous  
177 ubiquitous nuclear label in teleosts (Figures 1B/2A, Figure S3 and Supplementary  
178 Movie 1, n>10 embryos).

179

### 180 Proliferative cell marker

181

182 With the goal of generating an endogenous cell cycle reporter, we targeted the *pcna*  
183 (Proliferating cell nuclear antigen) locus to generate a *mScarlet-pcna* fusion protein.  
184 PcnA is an essential protein regulator of DNA replication and integrity in eukaryotic  
185 cells (Moldovan et al., 2007, Maga and Hubscher, 2003, Mailand et al., 2013). It has  
186 been previously shown that cells that exit the cell cycle, e.g. post-mitotic differentiated  
187 cell types, express very low levels of PcnA (Zerjatke et al., 2017, Thacker et al., 2003,  
188 Yamaguchi et al., 1995, Buttitta et al., 2010). This has led researchers to utilize PcnA  
189 as a highly conserved marker for proliferating cells (Zerjatke et al., 2017, Barr et al.,  
190 2016, Leonhardt et al., 2000, Leung et al., 2011, Piwko et al., 2010, Alunni et al., 2010).  
191 In addition to being a specific label for cycling cells, the appearance of nuclear speckles  
192 of PcnA within the nucleus is a hallmark of cells in late S phase of the cell cycle  
193 (Zerjatke et al., 2017, Barr et al., 2016, Leonhardt et al., 2000, Leung et al., 2011,  
194 Piwko et al., 2010, Santos et al., 2015). More recently, endogenously tagged PcnA has  
195 been used in mammalian cell lines to dynamically score all the different cell cycle  
196 stages (Zerjatke et al., 2017, Held et al., 2010, Piwko et al., 2010, Santos et al., 2015).  
197 We targeted the first exon of *pcna* with *mScarlet* with high efficiency (28% mosaic  
198 expression in F0s, and 50% germline transmission) and generated the *mScarlet-pcna*  
199 KI line (Figures 1C/2B, n>10 embryos). Using stage 40 medaka embryos, we detected  
200 mScarlet-PcnA positive cells within the epidermis, specifically in supra-basal  
201 epidermal cells (Figure 2B). A subset of these cells showed nuclear speckles of  
202 mScarlet-PcnA that likely represent replication foci and are a characteristic marker for  
203 late S phase (Figure 2B, yellow arrowheads). We validate the use of this line both as  
204 an organismal wide label for proliferative zones, and an endogenous cell cycle reporter  
205 in later sections.

206

207

### 208 Intra-cellular trafficking

209

210 To generate a reporter line allowing monitoring sub-cellular trafficking of endosomes  
211 and exosomes, we targeted Rab11a (Ras-Related Protein), a small GTPase and known  
212 marker of intra-cellular trafficking organelles in vertebrates (Welz et al., 2014, Cullen  
213 and Steinberg, 2018, Stenmark, 2009). We generated an N-terminus tagged *eGFP-*  
214 *rab11a* allele that labels sub-cellular trafficking organelles (Figure 2C, Figure S5 and

215 Supplementary Movies 2/3/4). As a proof of principle, we detected high levels of  
216 *eGFP-rab11a* in cells of the spinal cord (Figure 2C yellow arrowhead) and in  
217 neuromasts of the lateral line (Figure 2C magenta arrowhead, Figure S5,  
218 Supplementary Movie 4, n=6 embryos). Using the *eGFP-rab11a* KI line, we were also  
219 able to observe dynamics of intra-cellular organelle trafficking *in vivo* both in  
220 individual skin epithelial cells in the mid-trunk region and in the caudal fin region of  
221 developing medaka embryos (Supplementary Movies 2/3, n=4) validating the utility of  
222 this line as a sub-cellular trafficking marker in medaka.

223

#### 224 Stress granule marker

225

226 We were able to generate a *g3bp1-eGFP* KI line by targeting *eGFP* to the 11th exon of  
227 the medaka *g3bp1* gene. G3bp1 (GTPase activating protein SH3-domain binding  
228 protein) is a DNA/RNA-binding protein and an initiating factor involved in stress  
229 granule formation (Irvine et al., 2004, Yang et al., 2020). Stress granules are non-  
230 membrane bound cell compartments, which form under cellular stress and accumulate  
231 non-translating mRNA and protein complexes, and play an important role in cellular  
232 protection by regulating mRNA translation and stability (Decker and Parker, 2012,  
233 Protter and Parker, 2016). Under normal conditions G3bp1-eGFP is expressed in the  
234 cytoplasm (Figure 2F, Supplementary Movie 5, n=8 embryos) but upon stress  
235 (temperature shock), we observe that the protein changes its localization and  
236 accumulates in cytoplasmic foci corresponding to forming stress granules (Figure 2F'  
237 yellow arrowheads, Supplementary Movie 5, n=8 embryos). This is consistent with  
238 previous reports showing similar changes in the localization of G3bp1 in response to  
239 stress in a number of organisms (Guarino et al., 2019, Wheeler et al., 2016, Kuo et al.,  
240 2020). The initial characterization of the *g3bp1-eGFP* line shows its potential to serve  
241 as a real-time *in vivo* reporter for the dynamics of stress granules formation in a  
242 vertebrate model.

243

244

#### 245 Muscle cell marker

246

247 To label muscle cells, we targeted muscular *myosin heavy chain* with *mNeonGreen*.  
248 Myosins are a highly conserved class of motor proteins implicated in actin  
249 microfilament reorganization and movement (Sellers, 2000, Hartman and Spudich,  
250 2012). We generated an N-terminus fusion of *mNeonGreen-myosinhc* KI that  
251 exclusively labels muscle cells (Figures 1D/2D and Figure S4, n>10 embryos). In the  
252 medaka myotome, we were able to observe *mNeonGreen-myosinhc* chains of  
253 individual sarcomeres (A-bands separated by the I-bands), indicating that tagged  
254 Myosinhc is incorporated correctly in muscle fibers (Taylor et al., 2015, Loison et al.,  
255 2018). We use this line to record the endogenous dynamics of Myosinhc during muscle  
256 growth *in vivo* for the first time to the best of our knowledge, in a vertebrate model  
257 (Supplementary Movie 6 n=9 embryos). The *mNeonGreen-myosinhc* line therefore  
258 enables the *in vivo* recording of endogenous Myosinhc dynamics during myogenesis  
259 in medaka.

260

## 261 Cell adhesion marker

262

263 Cadherins are a highly conserved class of trans-membrane proteins that are essential  
264 components of cell-cell adhesion and are thus expressed on cellular membranes  
265 (Leckband and de Rooij, 2014). A large number of *cadherin* genes exist in vertebrates  
266 where they exhibit tissue specific expression patterns and are implicated in various  
267 developmental processes (Halbleib and Nelson, 2006). We decided to tag the C-  
268 terminus of medaka *cadherin 2* (*cdh2*, *n-cadherin*) with *eGFP*. *cdh2* is known to be  
269 expressed primarily in neuronal tissues in a number of vertebrates (Harrington et al.,  
270 2007, Suzuki and Takeichi, 2008). The *cdh2-eGFP* KI line shows cellular membrane  
271 expression in a variety of neuronal and non-neuronal tissues including the spinal cord,  
272 the notochord (Figure 2E, n=5 embryos) and neuromasts of the lateral line (Figure S5,  
273 Supplementary Movie 7, n=5 embryos), in addition to the developing heart (data not  
274 shown) (Chopra et al., 2011). The high expression of *cdh2* in both differentiated  
275 notochord cell types (Figure 2E, Figure S5) has not been previously reported in medaka  
276 but is not unexpected as this tissue experiences a high level of mechanical stress and  
277 requires strong cell-cell adhesion (Lim et al., 2017, Adams et al., 1990, Garcia et al.,  
278 2017, Seleit et al., 2020). The *cdh2-eGFP* KI is thus the first endogenously tagged  
279 cadherin family member in teleosts and can be used to study dynamics of *n-cadherin*  
280 distribution *in vivo* during vertebrate embryogenesis (Supplementary Movie 8).

281

## 282 ***mScarlet-pcna*: an organismal-wide marker for proliferative zones**

283

284 We reasoned that the novel *mScarlet-pcna* line can act as an organismal-wide *bona fide*  
285 marker for the location of proliferative cells within any tissue or organ of interest. We  
286 therefore decided to generate double transgenic animals with *eGFP-cbx1b* as a  
287 ubiquitous nuclear marker and *mScarlet-pcna* as a label for cycling cells (Figure 3A-  
288 C''). As a proof of principle, we set out to investigate the location of proliferative zones  
289 in a number of organs and tissues in medaka. We began by assessing the position of  
290 proliferative cells in neuromast organs of the lateral line (Seleit et al., 2017b, Pinto-  
291 Teixeira et al., 2015, Romero-Carvajal et al., 2015). Neuromasts are small rosette  
292 shaped sensory organs located on the surface of teleost fish that sense the direction of  
293 water flow and relay the information back to the Central Nervous System (CNS) (Seleit  
294 et al., 2017a, Romero-Carvajal et al., 2015, Jones and Corwin, 1993, Wada et al., 2013).  
295 They consist of four cell types: differentiated Hair Cells (HCs) in the very center,  
296 underlying Support Cells (SCs), a ring of Mantle Cells (MCs) and neuromast Border  
297 Cells (nBCs) (Seleit et al., 2017b, Dufourcq et al., 2006). Previous work in medaka has  
298 established MCs to be the true life-long neural stem cells within mature neuromast  
299 organs (Seleit et al., 2017b). While the *eGFP-cbx1b* labels all neural cells within a  
300 mature neuromast organ (HCs, SCs and MCs) (Figure 3A), *mScarlet-pcna* expression  
301 matches the previously reported location of proliferative MCs (Seleit et al., 2017b)  
302 (Figure 3A'-A'', white arrowhead). Neither the differentiated HCs nor the SCs directly  
303 surrounding them show evidence of PcnA expression in mature neuromast organs under  
304 homeostatic conditions in medaka (Figure 3A-A'', n=10 neuromast organs). Our

305 results validate the utility of *mScarlet-pcna* as an *in vivo* marker of proliferative cells.  
306 Previous work has shown that nBCs are induced to form from epithelial cells that come  
307 into contact with neuromast precursors during organ formation and that these induced  
308 cells become the stem cell niche of mature neuromast organs (Seleit et al., 2017b).  
309 However, an open question is whether transformed nBCs are differentiated, post-  
310 mitotic cells or whether they remain cycling. Utilizing the *mScarlet-pcna* line we were  
311 able to observe nBCs (4/42) in late S-phase of the cell cycle, as evident by the presence  
312 of nuclear speckles, in mature neuromast organs (Figure 3A'-A'', yellow arrowheads).  
313 This provides direct evidence that nBCs retain the ability to divide and are thus not  
314 post-mitotic cells.

315  
316 Next, we turned our attention to the optic tectum, which is essential for integrating  
317 visuomotor cues in all vertebrates (Lavker and Sun, 2003, Alunni et al., 2010, Nguyen  
318 et al., 1999). We show that proliferative cells in the optic tectum of medaka are located  
319 at the lateral, caudal and medial edge of the tectum in a crescent-like topology (Figure  
320 3B-B''). Moreover, *mScarlet-pcna* expression is graded, with the more central cells  
321 gradually losing expression of PcnA (Figure 3B', n=4 embryos). This is in line with  
322 previous histological findings using BrdU stainings in similarly staged medaka  
323 embryos (Nguyen et al., 1999, Alunni et al., 2010). We next analyzed the expression  
324 of *mScarlet-pcna* in the developing pectoral fin (Figure 3C-C'' n=4 embryos). We  
325 found that cells located proximally expressed the highest levels of *mScarlet-pcna*, with  
326 *mScarlet-pcna* expression decreasing gradually along the proximo-distal axis. To the  
327 best of our knowledge this proliferation pattern has not been previously reported and  
328 our data provides evidence that the differentiation axis of the pectoral fin is spatially  
329 organized from proximal to distal in medaka. Lastly, we reveal that proliferative cells  
330 are present in the spinal cord of stage 40 medaka embryos, a finding that has not been  
331 previously reported, and we show that these *mScarlet-pcna* positive cells occur in  
332 clusters preferentially located on the dorsal side of the spine (Figure S6, n=4). The  
333 newly developed *mScarlet-pcna* therefore acts as a stable label of proliferative cells  
334 and as such can be used to uncover the location of proliferation zones *in vivo* within  
335 organs or tissues of interest in medaka.

336  
337

### 338 ***mScarlet-pcna*: an endogenous cell cycle reporter**

339

340 In addition to its use as a marker for cells in S-phase, it has been shown that  
341 endogenously-tagged PcnA can be used to determine all other cell cycle phases. This is  
342 based on the fact that both the levels and dynamic distribution of PcnA shows  
343 reproducible characteristics in each phase of the cell cycle (Held et al., 2010, Piwko et  
344 al., 2010, Santos et al., 2015, Zerjatke et al., 2017). To assess whether the endogenous  
345 *mScarlet-Pcna* line recapitulates these known characteristic expression features during  
346 the cell cycle, we aimed to quantitatively analyze endogenous *mScarlet-Pcna* levels in  
347 individual cells during their cell cycle progression. To this end, we imaged skin  
348 epithelial cells located in the mid-trunk region of medaka embryos (Figure 4A-D,  
349 Figures S7/S8). Cells in the G1 phase of the cell cycle have been shown to decrease



350 the levels of PcnA within the nucleus over time (Figure S7, Supplementary Movie 9,  
351 n= 9 epithelial cells) (Zerjatke et al., 2017). On the other hand, cells progressing  
352 through to S phase have been shown to increase the levels of PcnA expression within  
353 the nucleus over time (Leonhardt et al., 2000, Piwko et al., 2010, Leung et al., 2011,  
354 Santos et al., 2015, Barr et al., 2016, Zerjatke et al., 2017, Held et al., 2010). All the  
355 tracked epithelial cells that eventually underwent a cellular division during our time-  
356 lapse imaging showed an increase in nuclear intensity of mScarlet-PcnA over time  
357 (Figure 4A-B, n= 9 epithelial cells). Late S phase is categorized by the occurrence of  
358 nuclear speckles of PcnA marking the presence of replication foci (Leonhardt et al.,  
359 2000, Piwko et al., 2010, Leung et al., 2011, Santos et al., 2015, Barr et al., 2016,  
360 Zerjatke et al., 2017), which we observe in every dividing epithelial cell prior to cell  
361 division (Figure 4A, Supplementary Movie 10, n= 9 epithelial cells). The S/G2  
362 transition is marked as the point of peak pixel intensity distribution of endogenous PcnA  
363 within the nucleus (Zerjatke et al., 2017), which we are able to obtain for each dividing  
364 cell by a combination of 3D surface plots and histograms of pixel intensity distributions  
365 over time (Figure 4C-C''', Figures S7/S8 and Supplementary Movies 10/11/12, n= 9  
366 epithelial cells). While the M phase is marked with a sharp decrease in nuclear levels  
367 of PcnA (Zerjatke et al., 2017), which can be consistently seen in the endogenous  
368 *mScarlet-pcnA* intensity tracks of epithelial cells undergoing division (Figure 4B,  
369 Figures S7/S8, Supplementary Movies 10/11/12, n= 9 epithelial cells). Cells are in the  
370 G2 phase of the cell cycle in the time frame between the S/G2 transition point to the  
371 beginning of M phase. We therefore provide first evidence that the *mScarlet-pcnA* line  
372 recapitulates known dynamics of PcnA within the nucleus (Held et al., 2010, Piwko et  
373 al., 2010, Santos et al., 2015, Zerjatke et al., 2017) and that it can therefore be utilized  
374 as an endogenous 'all-in one' cell cycle reporter in vertebrates.

375

376

377

## 378 Discussion

379

380 Despite the CRISPR/Cas9 system being repurposed as a broad utility genome editing  
381 tool almost a decade ago (Jinek et al., 2012, Cong et al., 2013) and despite its  
382 revolutionary impact as a method to generate knock-ins by homology directed repair  
383 (Wang et al., 2016, Danner et al., 2017, Jasin and Haber, 2016, Ceccaldi et al., 2016),  
384 there is still a paucity of precise, single-copy fusion protein lines in vertebrates, in  
385 general, and in teleost fish in particular. In fact, in medaka there are a total of three  
386 validated single-copy fusion protein lines reported prior to this work (Gutierrez-Triana  
387 et al., 2018) while in zebrafish only a handful of lines have been generated (Wierson  
388 et al., 2020, Hisano et al., 2015, Hoshijima et al., 2016, Shin et al., 2014, Wierson et  
389 al., 2019). This underscores the complexity of generating and validating precise single-  
390 copy fusion protein knock-in lines in teleost models. Previous techniques to generate  
391 large KIs (such as fluorescent reporters) required the usage of plasmid vectors  
392 commonly containing long homology arms (>200bp) (Zu et al., 2013, Auer and Del  
393 Bene, 2014, Shin et al., 2014). Problems arising during and after injection include DNA

394 concatemerization of the donor construct (Gutierrez-Triana et al., 2018, Auer et al.,  
395 2014, Winkler et al., 1991), in addition to possible imprecise and off-target integration  
396 of either the fluorescent protein sequence or the plasmid backbone (Auer et al., 2014,  
397 Gutierrez-Triana et al., 2018, Won and Dawid, 2017, Wierson et al., 2020, Cristea et  
398 al., 2013, Shin et al., 2014, Wierson et al., 2019, Yao et al., 2017). The vast majority  
399 of reported HDR mediated knock-ins in teleosts rely on *in vivo* linearization of the  
400 plasmid donors. This strategy is utilized due to the observation that, although linear  
401 dsDNA donors can drive HDR, they might be prone to degradation, concatemerization,  
402 and are generally thought to be more toxic than plasmid donors (Auer et al., 2014,  
403 Cristea et al., 2013, Shin et al., 2014, Ota et al., 2014). Plasmid donors therefore contain  
404 an additional guide RNA sequence to drive *in vivo* linearization in order to synchronize  
405 the availability of the linear DNA donor with Cas9 activity (Auer et al., 2014, Cristea  
406 et al., 2013, Shin et al., 2014, Lisby and Rothstein, 2004, Ota et al., 2014). We reasoned  
407 that directly injecting PCR amplified linear DNA with short homology arms (~35bp)  
408 could be highly effective since these donors are relatively small (~780 bp) compared  
409 to plasmids (several kbs) , and therefore a small quantity of donors (~10 ng/ul) will  
410 provide a large number of molecules (~20 nM) available to engage the HDR machinery  
411 following the Cas9 induced DSB. Building on recent improvements in CRISPR/Cas9  
412 knock-in strategies, we used 5' biotinylated primers in order to limit *in vivo*  
413 concatemerization of the donor construct (Gutierrez-Triana et al., 2018), and synthetic  
414 sgRNAs were used to increase the efficiency of DSBs by Cas9 (Paix et al., 2015, Kroll  
415 et al., 2021, Hoshijima et al., 2019, Li et al., 2019). In addition, we utilized a  
416 monomeric streptavidin tagged Cas9 that has a high affinity to the biotinylated donor  
417 fragments to increase targeting efficiency (Gu et al., 2018). We report that this  
418 approach is a highly efficient, precise and scalable strategy for generating single-copy  
419 fusion proteins (Table1 and Table S1). Since the repair donors are synthesized by PCR  
420 amplification, we eliminate the need for both cloning and a second gRNA for *in vivo*  
421 linearization. Very recently a similar approach to the one we present here showed the  
422 potential to generate KI lines in zebrafish by targeting non-coding regions with PCR  
423 amplified donor constructs (Levic et al., 2021). All in all, the strategy we utilize  
424 significantly simplifies the process of endogenous protein tagging in a vertebrate  
425 model.

426  
427 An important aspect of any knock-in strategy to generate fusion proteins is its  
428 precision. The validation process of single copy insertions is complicated in approaches  
429 that use long homology arms (>200bps) to generate knock-ins as concatemerization  
430 cannot be easily ruled out. *Locus* genotyping by PCR and Sanger sequencing is difficult  
431 when using primers external to the repair donor due to the large size of the expected  
432 fragment. Internal primers within the donor (junction-PCR) have been used to avoid  
433 this limitation, but this can lead to PCR artefacts and crucially, it does not rule out  
434 concatemerization of the injected dsDNA (Won and Dawid, 2017, Gutierrez-Triana et  
435 al., 2018, Wierson et al., 2020). Southern blotting is considered the gold standard to  
436 assess single-copy integration (Wierson et al., 2020, Gutierrez-Triana et al., 2018, Won  
437 and Dawid, 2017). While it has its advantages, Southern Blotting depends on  
438 experimental design (genomic DNA digestion strategy) and probe design/sensitivity,

439 and therefore cannot exclude that part of the donor construct or part of the vector  
440 backbone integrates elsewhere in the genome. Indeed, it has been reported that plasmid  
441 donors can lead to additional unwanted insertions in the genome (Won and Dawid,  
442 2017, Wierson et al., 2020). We address those issues by performing WGS with high  
443 coverage on knock-in lines and provide evidence that our approach yields single-copy  
444 integration only at the desired *locus* (Figure S2). In addition, utilizing repair donors  
445 with short homology arms on both ends (30-40bp) simplifies the validation of the  
446 insertion by using primers that sit outside the targeting donor fragment. These external  
447 primers can then be used for genotyping of the full insertion by simple PCR followed  
448 by Sanger sequencing to know the precise nature of the edit (Figure S2). We show that  
449 the usage of donor fragments with short homology arms, in combination with high  
450 coverage WGS, to be important aspects in validating the precision of single-copy  
451 CRISPR/Cas9 mediated knock-in lines in vertebrate models.

452  
453 We were able to generate six novel endogenous protein fusion lines that significantly  
454 expand the repertoire of genetic tools to track cellular dynamics in medaka. The *eGFP-*  
455 *cbx1b* KI line is the first reported endogenous ubiquitous nuclear marker in teleosts  
456 (Nielsen et al., 2001, Lomberk et al., 2006, Gilmore et al., 2016). The generation of  
457 truly ubiquitous lines by transgene over-expression in teleost fish (Centanin et al.,  
458 2014, Burket et al., 2008) is a difficult endeavor and requires constant monitoring for  
459 variegation and silencing (Goll et al., 2009, Akitake et al., 2011, Burket et al., 2008,  
460 Stuart et al., 1990). Yet these ubiquitous fluorescent reporter lines are invaluable tools  
461 for researchers. Ubiquitous fusion-proteins expressed from the endogenous *locus* avoid  
462 potential issues with transgene over-expression and variegation. The highly conserved  
463 *cbx1b locus* could therefore provide an alternative strategy to generate faithful  
464 ubiquitous nuclear markers in other teleosts and non-model organisms. In addition, this  
465 *locus* could serve as a landing site for ubiquitous expression of genetic constructs (for  
466 e.g. utilizing a T2A peptide) in medaka (Li et al., 2019, Kim et al., 2011). Next, we  
467 validate the use of *g3bp1-eGFP* knock-in as a stress granule formation marker, and  
468 utilizing 4-D live-imaging show the formation of stress granules in response to  
469 temperature shock in real-time, as previously shown in other models using a variety of  
470 stress conditions (Guarino et al., 2019, Kuo et al., 2020, Wheeler et al., 2016, Decker  
471 and Parker, 2012, Protter and Parker, 2016). This line can therefore be used both as an  
472 *in vivo* marker of stress conditions and to study the process of stress granule formation.  
473 The *eGFP-rab11a* line serves as an intra-cellular trafficking (Welz et al., 2014, Cullen  
474 and Steinberg, 2018) marker that allows us to dynamically follow exosomes and  
475 endosomes *in vivo*. We report that both neuromasts and the spinal cord show  
476 substantially higher expression of *rab11a* than other tissues, the basis of this remains  
477 unclear but could indicate that these tissues exhibit higher levels of protein turn-over.  
478 Despite being a highly conserved protein involved in myogenesis (Sellers, 2000,  
479 Hartman and Spudich, 2012), no endogenous KI of any myosin family member has  
480 been reported in teleosts. The *mNeonGreen-myosinhc* knock-in enables the detection  
481 and recording of endogenous myosin dynamics *in vivo* during muscle growth in a  
482 vertebrate model. We also generate *cdh2-eGFP* as the first reported fusion-protein line  
483 for a Cadherin family member in teleosts (Leckband and de Rooij, 2014, Halbleib and

484 Nelson, 2006) and show that it is primarily expressed in neuronal tissues including the  
485 spinal cord and neuromasts. Since N-cadherin has been shown to be involved in  
486 Epithelial–Mesenchymal Transition (EMT) (Harrington et al., 2007, Suzuki and  
487 Takeichi, 2008, Desclozeaux et al., 2008), this line can be used to study dynamical  
488 changes in N-cadherin distribution *in vivo* facilitating our understanding of EMT and  
489 other fundamental cell adhesion processes in vertebrates. Lastly, we generate and  
490 characterize the *mScarlet-pcna* knock-in line and discuss its usage and implications  
491 across teleosts below.

492  
493 An overarching goal of developmental and stem cell biology is to discover the location  
494 of stem and progenitor cells in different organs and tissues, followed by a molecular  
495 characterization of their properties (Rhee et al., 2006, Nowak et al., 2008, Snippert et  
496 al., 2010, Buczacki et al., 2013, Lu et al., 2012, Lavker and Sun, 2003). Major advances  
497 have relied on finding resident stem cell markers that differentiates stem cells from  
498 other cell types within the same tissue, followed by BrdU/IdU staining to confirm their  
499 proliferative abilities (Nguyen et al., 1999, Rhee et al., 2006, Nowak et al., 2008,  
500 Nowak and Fuchs, 2009, Alunni et al., 2010, Snippert et al., 2010, Lu et al., 2012,  
501 Buczacki et al., 2013, Stolper et al., 2019, Tsingos et al., 2019). However, BrdU/IdU  
502 staining requires the sacrifice of the animal precluding the ability to perform 4D live-  
503 imaging to analyze stem cell behavior *in vivo* over time. The medaka knock-in line  
504 with endogenously labeled PcnA that we present here helps to circumvent this  
505 limitation. In addition, since PcnA is expressed exclusively in cycling cells (Yamaguchi  
506 et al., 1995, Thacker et al., 2003, Buttitta et al., 2010, Zerjatke et al., 2017), it has the  
507 potential to be used to discover the location of proliferative zones *in vivo* within any  
508 organ or tissue of interest. We provide proof of principle evidence that the *mScarlet-*  
509 *pcna* KI line acts as a *bona fide* marker for proliferative zones in a variety of tissues in  
510 medaka fish. This line therefore represents an important new tool for stem cell research  
511 in medaka. A similar strategy could be adopted to generate endogenously tagged PcnA  
512 both in the teleost field and in other organisms.

513  
514 In addition to its use as a *bona fide* marker for proliferative zones, we provide evidence  
515 that the *mScarlet-pcna* line can be used as an endogenous cell cycle reporter in medaka.  
516 It has previously been shown that both the levels and dynamic distribution of PcnA are  
517 indicative of the different the cell cycle phases (Held et al., 2010, Piwko et al., 2010,  
518 Santos et al., 2015, Zerjatke et al., 2017). This led researchers to successfully utilize it  
519 as an ‘all-in-one’ cell cycle reporter in mammalian cells (Held et al., 2010, Piwko et  
520 al., 2010, Santos et al., 2015, Zerjatke et al., 2017). By quantitatively tracking  
521 endogenous PcnA levels during one cell cycle in epidermal cells of medaka fish, we  
522 were able to confirm the dynamic nature of *mScarlet-pcna* expression, which correlated  
523 with the previously described behavior of the PcnA protein within the nucleus of other  
524 vertebrates (Held et al., 2010, Piwko et al., 2010, Santos et al., 2015, Zerjatke et al.,  
525 2017). As such, we provide proof of principle evidence that the *mScarlet-pcna* line can  
526 be successfully used as an endogenous cell cycle reporter in a teleost model. Using the  
527 visualization of endogenous PcnA for cell cycle phase classification offers an attractive  
528 alternative to cell cycle reporters that rely on the insertion of two-colour transgenes,

529 such as the FUCCI system (Sugiyama et al., 2009, Dolfi et al., 2019, Araujo et al.,  
530 2016, Bajar et al., 2016, Oki et al., 2014, Sakaue-Sawano et al., 2008). First, by using  
531 endogenous fusion proteins there is no requirement for over-expression of cell cycle  
532 regulators. Second, the potential issue with transgene variegation and silencing is  
533 avoided (Akitake et al., 2011, Goll et al., 2009, Burket et al., 2008, Stuart et al., 1990).  
534 Finally, utilizing a single color cell-cycle reporter allows its simultaneous use with  
535 other fluorescent reporters during live-imaging experiments. Due to the high  
536 conservation of PcnA in eukaryotes, developing PcnA reporters in other model  
537 organisms using a similar strategy is an attractive possibility to pursue.

538

539

540

541

542

543

544

545

546

547

548

549

550

551

552

553

554

555

556

557

558

559

560

561

562

563

564

565

566

567

568

569

570

571

572

## 569 **Figure legends**

570

### 571 **Figure 1: Cloning-free single copy CRISPR/Cas9 mediated KI lines in medaka**

572 (A) Schematic diagram of cloning-free CRISPR knock-in strategy. The injection mix  
573 consists of three components, a sgRNA targeting the gene of interest, Cas9-mSA  
574 mRNA and the PCR amplified donor plasmid containing short homology arms on both  
575 ends (30-40bp) and the fluorescent protein of interest with no ATG and no Stop codon.  
576 Note that the 5' ends of the PCR donor fragment are biotinylated (Btn). The mix is  
577 injected in one-cell staged medaka embryos and the injected fishes are screened for  
578 potential in-frame integrations mediated by Homology-Directed Repair (HDR).

579 (B) *eGFP-cbx1b* F1 CRISPR KI line stage 40 medaka embryos. eGFP-Cbx1b labels  
580 all nuclei. n>10 embryos. Scale bar = 100µm

581 (C) *mScarlet-pcna* F1 CRISPR KI line stage 40 medaka embryos. mScarlet-Pcna labels  
582 exclusively cycling cells. n>10 embryos. Scale bar = 100µm.

583 (D) *mNG-myosinhc* F1 CRISPR KI line stage 40 medaka embryos. line. mNG-  
584 Myosinhc labels exclusively muscle cells. n>10 embryos. Scale bar = 100µm.

585

### 586 **Figure 2: Tissue and organelle specific expression of six CRISPR/Cas9 KI lines in** 587 **medaka**

588 (A) *eGFP-cbx1b* F1 stage 40 medaka embryo. eGFP-Cbx1b labels all nuclei. Nuclei in  
589 the spinal cord of medaka are highlighted (Yellow arrowhead). n>10 embryos. Scale  
590 bar = 30µm.

591 (B) *mScarlet-pcna* F1 stage 40 medaka embryo. mScarlet-Pcna is localized in the  
592 nuclei of cycling cells. mScarlet-Pcna is visible in skin epithelial cell nuclei located in  
593 the mid-trunk region of a medaka embryo. The localization of Pcna as speckles within  
594 the nucleus indicates cells in S phase of the cell cycle (Yellow arrowheads). n= 10  
595 embryos. Scale bar = 20µm.

596 (C) *eGFP-rab11a* F1 stage 40 medaka embryo. Expression of the membrane  
597 trafficking marker eGFP-Rab11a is evident in the caudal fin region. eGFP-Rab11a is  
598 strongly expressed in the spinal cord (Yellow arrowhead) and lateral line neuromasts  
599 (Magenta arrowhead). n=6 embryos. Scale bar = 30µm.

600 (D) *mNG-myosinhc* F1 stage 40 medaka embryo. mNG-Myosinhc is expressed solely  
601 in muscle cells. Myofibrils containing chains of individual sarcomere can be seen  
602 (mNG-Myosinhc labels the Myosin A band inside each sarcomere). n>10 embryos.  
603 Scale bar = 30µm.

604 (E) *cdh2-eGFP* F1 stage 40 medaka embryo. Cdh2-eGFP is localized at cell  
605 membranes in several tissues, including the spinal cord (Magenta arrowhead) and the  
606 notochord (Yellow arrowhead). n= 5 embryos. Scale bar= 50µm.

607 (F-F') *g3bp1-eGFP* F1 stage 34-35 medaka embryo. Time-lapse imaging of G3bp1-  
608 eGFP dynamics under normal and stress conditions. (F) G3bp1-eGFP localizes to the  
609 cytoplasm under physiological conditions. (F') under stress conditions (temperature  
610 shock), G3bp1-eGFP localizes to stress granules (Yellow arrowheads). Time in hours.  
611 n= 8 embryos. Scale bar= 50µm.

612

613 **Figure 3: *mScarlet-pcna* line acts as an organismal-wide marker for proliferative**  
614 **zones**

615 (A-A'') (*eGFP-cbx1b*) (*mScarlet-pcna*) double positive stage 40 medaka embryo.  
616 Maximum projection of a mature secondary neuromast (center of image) within the  
617 lateral line system. surrounded by epithelial cells labelled by: endogenous *eGFP-*  
618 *Cbx1b* in (A) and endogenous *mScarlet-Pcna* in (A'). The merge is shown in (A''). (A)  
619 *eGFP-Cbx1b* is a ubiquitous nuclear marker and labels all cell types within a mature  
620 neuromast. Those are: Hair Cells (HCs) in the center of a neuromast, surrounded by  
621 Support Cells (SCs) and an outer ring of Mantle Cells (MCs) surrounded by the  
622 elongated neuromast Border cells (nBCs). (A') *mScarlet-Pcna* labels cycling cells,  
623 which are located at the very edge of the mature neuromast organ, a proportion of  
624 Mantle Cells (MCs) express *mScarlet-Pcna* (white arrowheads). Neuromast border  
625 cells (nBCs) also express *mScarlet-Pcna*. Speckles can be seen in several *mScarlet-*  
626 *Pcna positive* nBC nuclei (yellow arrowheads), indicating cells in late S phase of the  
627 cell cycle. (A'') Merged image. n= 10 neuromast organs. Scale bar = 20 $\mu$ m.

628 (B-B'') (*eGFP-cbx1b*) (*mScarlet-pcna*) stage 40 medaka embryo. Single Z-slice  
629 showing the medaka optic tectum. (B) *eGFP-Cbx1b* is a ubiquitous nuclear marker (B')  
630 whereas *mScarlet-Pcna* labels a subset of cells at the outer periphery of the optic  
631 tectum, indicating the position of proliferative cells in this tissue. A graded expression  
632 of *mScarlet-Pcna* is observed, with more central cells in the optic tectum losing the  
633 expression of *mScarlet-Pcna*. (B'') Merged image. n= 4 embryos. Scale bar = 30 $\mu$ m.

634 (C-C'') Maximum projection of the pectoral fin of stage 40 medaka embryos. (C)  
635 *eGFP-Cbx1b* is a ubiquitous nuclear marker (C') while a subset of cells is labeled by  
636 *mScarlet-Pcna* indicating the position of proliferative cells. Note the proximal to distal  
637 gradient of *mScarlet-Pcna* expression, with proliferative cells at the base of the fin (left)  
638 and differentiated cells at the outer edges of the fin (right) (C'') Merged image. n=4  
639 embryos. Scale bar = 50 $\mu$ m.

640

641 **Figure 4: Quantitative live cell-tracking of endogenous *mScarlet-Pcna* levels**  
642 **enables cell cycle phase classification**

643 (A-A'') Selected frames from a time-lapse imaging of a *mScarlet-Pcna* positive skin  
644 epidermal cell nucleus (yellow circle) undergoing cell division. The different phases  
645 of the cell cycle are deduced from *mScarlet-Pcna* expression as highlighted within the  
646 panels. Late S phase can be distinguished by the presence of nuclear speckles that  
647 correspond to replication foci. n= 9 skin epithelial cells. Time in hours.

648 (B-B'') 3D surface plots of cell from (A). The S/G2 transition is marked as the point  
649 of peak pixel intensity distribution within the nucleus, which is reached at 15:40h (B')  
650 and is equivalent to the largest width of *mScarlet-Pcna* pixel intensity distribution  
651 shown in panel D (red arrow). n= 9 skin epidermal cells.

652 (C) Normalized *mScarlet-Pcna* intensity within the nucleus from cell in (A) over the  
653 course of one cell division. Vertical dashed red lines demarcate the different cell cycle  
654 phases based on the intensity and dynamic distribution of *mScarlet-Pcna* within the  
655 nucleus. Initially an increase of endogenous *mScarlet-Pcna* expression over time  
656 indicates cells in S phase of the cell cycle. M phase is characterized by a sharp drop in  
657 nuclear *mScarlet-Pcna* levels beginning at 20:00h.

658 (D) Width of pixel intensity distribution over time on cell from (A). The S/G2 transition  
659 is marked as the point of peak pixel intensity distribution within the nucleus, which is  
660 reached at 15:40h and is equivalent to the largest width of mscarlet-Pcna pixel intensity  
661 distribution (red arrow). n= 9 skin epidermal cells.

662

663 **Supplementary Figure 1: Schematic representation of *mNeonGreen-myosinhc***  
664 **tagging strategy**

665 (A) PCR amplification of *mNeonGreen-HAtag-Linker* (Green, Orange and Purple)  
666 using primers homologous to the extremity of the insert and containing flanking  
667 sequence corresponding to the homology arms (Blue) for insertion at the ATG of  
668 *myosinhc* gene (Yellow). The primers contain 5'end Biotins (Brown circle).

669 (B) Insertion of *mNeonGreen-HAtag-Linker* just downstream the ATG of *myosinhc*  
670 (Yellow) following Cas9-mSA / sgRNA DNA induced cut. Lower letters denote  
671 noncoding sequence, upper letters coding sequence, bold the sgRNA PAM, underlined  
672 the sequence upstream the PAM recognized by the sgRNA, blue letters the sequence  
673 homologous between the *myosinhc* locus and the PCR donor.

674

675 **Supplementary Figure 2. Alignment of whole genome sequencing reads (WGS) to**  
676 **fluorescent protein sequences:**

677 (A) *eGFP* integration in *cbx1b* locus. Paired-end sequenced reads from *eGFP-cbx1b*  
678 F1 embryos, 2 biological replicates (gDNA1 and gDNA2) from the same F0 founder  
679 are shown in the upper and lower panel, coloured in grey for concordant mappings and  
680 coloured in turquoise/purple for inter-chromosomal paired-ends with one mate mapped  
681 to chr19 (left panel) and one mate mapped to *eGFP* (right panel). The predicted  
682 integration site is shown as a vertical dashed line with soft-clipped reads (shown as  
683 coloured bases) to the left and right of the integration site. Above the sequenced reads  
684 is the basepair-level coverage histogram. Coverage of *eGFP-cbx1b\_gDNA1* is 20.4X  
685 and for *eGFP-cbx1b\_gDNA2* is 23.6X.

686 (B) *mScarlet* integration in *pcna* locus. Paired-end sequenced reads from *mScarlet-*  
687 *pcna* F1 embryos, coloured in grey for concordant mappings and coloured in  
688 turquoise/green for inter-chromosomal paired-ends with one mate mapped to chr9 (left  
689 panel) and one mate mapped to *mScarlet* (right panel). The predicted integration site is  
690 shown as a vertical dashed line with soft-clipped reads (shown as coloured bases) to  
691 the left and right of the integration site. Above the sequenced reads is the basepair-  
692 level coverage histogram. Coverage of *mScarlet-pcna* is 14.4X.

693 (C) *mNeongreen* integration in *myosinhc* locus: Paired-end sequenced reads from  
694 *mNG-myosinhc* F1 embryos, coloured in grey for concordant mappings and coloured  
695 in dark grey/purple for inter-chromosomal paired-ends with one mate mapped to chr8  
696 (left panel) and one mate mapped to *mNeonGreen* (right panel). The predicted  
697 integration site is shown as a vertical dashed line with soft-clipped reads (shown as  
698 coloured bases) to the left and right of the integration site. Above the sequenced reads  
699 is the basepair-level coverage histogram. Paired-end analysis yielded a second, weakly  
700 supported insertion of *mNeonGreen* at chr12:9083923 which could not be confirmed  
701 by PCR, suggesting that this is a false positive prediction or a mosaic insertion of very  
702 low frequency. Coverage of *mNG-myosinhc* is 14.5X.



- 703 **(D)** Sanger sequencing read from *eGFP-cbx1b* F1 fin-clipped adult shows scarless  
704 integration of *eGFP* into the *cbx1b* locus in both 5' and 3' junctions  
705 **(E)** Sanger sequencing reads from *mScarlet-pcna* F1 fin-clipped adult shows scarless  
706 integration of *mScarlet* into the *pcna* locus at the 3' junction. While the 5' junction  
707 shows correct in-frame fusion of endogenous *pcna* to *mScarlet*, we were able to detect  
708 a partial duplication of the 5' homology arm that occurred 22bp upstream of the start  
709 codon of endogenous *pcna* (for details see materials and methods).  
710 **(F)** Sanger sequencing reads from *mNG-myosinhc* F1 fin-clipped adult shows scarless  
711 integration of *mNeonGreen* into the *myosinhc* locus in both 5' and 3' junctions.  
712

713 **Supplementary Figure 3: Ubiquitous nuclear expression of *eGFP-cbx1b***

- 714 **(A)** Anterior head region of *eGFP-cbx1b* F1 stage 40 medaka embryo. eGFP-Cbx1b is  
715 expressed ubiquitously with a nuclear localization. n>10 embryos. Scale bar = 100µm.  
716 **(B)** Maximum projection of spinal cord and notochord in the mid-trunk region of  
717 *eGFP-cbx1b* stage 40 medaka embryo. All nuclei are labeled by eGFP-Cbx1b. n>10  
718 embryos. Scale bar = 30µm  
719 **(C)** A subset of epithelial cell nuclei positive labeled by eGFP-Cbx1b. n>10 embryos.  
720 Scale bar = 30µm.  
721 **(D)** Partial view of the gut of *eGFP-cbx1b* KI stage 40 medaka embryo. Gut microvilli  
722 are positive for eGFP-Cbx1b (Yellow arrowhead). >10 embryos. Scale bar = 30µm.  
723

724 **Supplementary Figure 4: Muscle specific expression of *mNG-myosinhc***

- 725 **(A)** Muscle cells of *mNG-myosinhc* F1 stage 40 medaka embryo. mNG-Myosinhc is  
726 expressed in muscle cells of the posterior tail region and forms myofibrils, view of  
727 myofibrils from Figure 2D. n=10 embryos. Scale bar = 50µm.  
728 **(B-C)** Pectoral fin of *mNG-myosinhc* F1 stage 40 medaka embryo. mNG-Myosinhc is  
729 expressed in muscles of the pectoral fin, and myofibrils radiate from the base of the  
730 pectoral fin. (C) is a close up of (B). n=10 embryos. Scale bar=50µm.  
731 **(D)** Body trunk of *mNG-myosinhc* F1 stage 40 medaka embryo. mNG-Myosinhc is  
732 expressed in muscle cells in the body trunk. Close-up of muscle cells from Figure 2D.  
733 n=10 embryos. Scale bar =50µm  
734

735 **Supplementary Figure 5: Tissue-specific expression of *eGFP-rab11a* and *cdh2-*  
736 *eGFP* KI lines**

- 737 **(A)** Neuromasts of *eGFP-rab11a* F1 stage 40 medaka embryo. eGFP-rab11a is  
738 strongly expressed in the posterior lateral line neuromasts and posterior lateral line  
739 nerve. Ventral primary neuromasts strongly express eGFP-Rab11a (magenta  
740 arrowheads), as well as secondary neuromasts located at the horizontal myoseptum  
741 (yellow arrowheads). n=10 embryos. Scale bar = 100µm.  
742 **(B)** Anterior region of *eGFP-rab11a* F1 stage 40 medaka embryo. eGFP-Rab11a is  
743 strongly expressed in the optic tectum (magenta arrowhead) and in the optic vesicle  
744 sensory organs (yellow arrowhead). n=10 embryos. Scale bar = 50µm.  
745 **(C)** Close-up on a ventral primary neuromast of *eGFP-rab11a* F1 stage 40 medaka  
746 embryo. Strong expression of eGFP-Rab11a in neuromast cells (magenta arrowhead)  
747 and the lateral line nerve (yellow arrowhead). n=10 embryos. Scale bar = 10µm.

- 748 (D) Spinal cord of *eGFP-rab11a* F1 stage 40 medaka embryo. eGFP-Rab11a is  
749 strongly expressed in the spinal cord. n=10 embryos. Scale bar = 10 $\mu$ m.  
750 (E) Eye of *cdh2-eGFP* F1 stage 40 medaka embryo. Cdh2-eGFP is strongly expressed  
751 in elongated cells covering the retina. n=10 embryos. Scale bar = 30 $\mu$ m  
752 (F) expression of *cdh2-eGFP* F1 in stage 40 medaka embryo. Cdh2-eGFP is expressed  
753 in the spinal cord (magenta arrowhead) and notochord sheath cells (yellow arrowhead).  
754 n=10 embryos. Scale bar = 50 $\mu$ m.  
755 (G) Notochord of *cdh2-eGFP* F1 stage 40 medaka embryo. Cdh2-eGFP is expressed  
756 in notochord vacuolated cells (yellow arrowhead). n=10 embryos. Scale bar = 30 $\mu$ m.  
757 (H) Neuromast support and hair cells of *cdh2-eGFP* F1 stage 40 medaka embryo.  
758 Neuromast support and hair cells within a mature primary neuromast organ express  
759 high levels of Cdh2-eGFP. n=10 embryos. Scale bar = 10 $\mu$ m.  
760

### 761 **Supplementary Figure 6: Proliferative cells in the anterior spinal cord**

- 762 (A) Maximum projection of the anterior spinal cord of an (*eGFP-cbx1b*) (*mScarlet-*  
763 *pcna*) double KI stage 40 medaka embryo. eGFP-Cbx1b (Green) is expressed in all  
764 anterior spinal cord nuclei. n=4 embryos. Scale bar= 30 $\mu$ m.  
765 (B) A subset of anterior spinal cord cells are positive for mScarlet-Pcna (Magenta)  
766 indicating the existence of cycling cells. mScarlet-Pcna positive cells (yellow  
767 arrowheads) are more clustered towards the dorsal side of the spinal cord. n=4  
768 embryos. Scale bar= 30 $\mu$ m.  
769 (C) Merged image of anterior spinal cord with eGFP-Cbx1b (Green) (A) and mScarlet-  
770 Pcna (Magenta) (B). n=4 embryos. Scale bar= 30 $\mu$ m.  
771

### 772 **Supplementary Figure 7: Quantification of endogenous *mScarlet-pcna* levels** 773 **utilized for cell cycle phase classification**

- 774 (A-A') Selected frames from a time-lapse of a mScarlet-Pcna positive epithelial cell  
775 nucleus that did not undergo cell division over the course of the time-lapse (A, yellow  
776 dashed circle). Time in hours. Quantification of normalized mScarlet-Pcna levels  
777 shows a decrease of endogenous expression over time indicative of cells in the G1  
778 phase of the cell cycle (A', n= 9 cells).  
779 (B) Tracking of endogenous mScarlet-Pcna dynamics in 9 epithelial cell nuclei that do  
780 not undergo cell division over the course of the time-lapse (black line = mean).  
781 Endogenous mScarlet-Pcna levels decrease over time indicative of cells in the G1  
782 phase of the cell cycle.  
783 (C) Tracking of endogenous mScarlet-Pcna dynamics in 9 epithelial cell nuclei that  
784 undergo cellular division (black line = mean). Endogenous mScarlet-Pcna levels  
785 increase over time, indicative of cells in the S phase of the cell cycle.  
786 (D) Individual traces of normalized mScarlet-Pcna expression in 9 epithelial cells  
787 shown in (B). The tracked cells did not divide over the course of the time-lapse.  
788 Normalized intensity of mScarlet-Pcna decreases over time indicative of cells in the  
789 G1 phase of the cell cycle.  
790 (E) Individual traces of normalized mScarlet-Pcna expression in 9 epithelial cells  
791 shown in (C). The tracked cells underwent a cell division over the course of the time-  
792 lapse. Normalized intensity of mScarlet-Pcna increases over time indicative of cells in

793 the S phase of the cell cycle. The beginning of the sharp drop in endogenous mScarlet-  
794 PcnA intensity marks entry into M phase.

795

796 **Supplementary Figure 8: mScarlet-pcnA histograms of pixel intensity distribution**  
797 **during cell cycle progression**

798 (A) Width of mScarlet-PcnA pixel intensity over the course of one cell cycle, the S/G2  
799 transition corresponds to the point of peak pixel intensity distribution within the  
800 nucleus and is marked by a red arrow. Data from (A-B) is shown in Figure 4.

801 (B-B'') Histograms of pixel intensity distribution within the nucleus of the same cell  
802 shown in Figure 4A over the course of one cell cycle. The different phases of the cell  
803 cycle are marked in red based on the combination of endogenous intensity profiles, 3D  
804 surface plots and histograms of pixel intensity distributions. The S/G2 transition is  
805 reached in 15:40 and marks the point of peak pixel intensity distribution within the  
806 nucleus. M phase is marked by a sharp drop in endogenous mScarlet-PcnA expression.  
807 n= 9 epithelial cells.

808

809 **Supplementary Movie 1: Z-stack through the caudal fin region of a stage 39-40 *cbx1-***  
810 ***eGFP* medaka embryo. eGFP-Cbx1b is expressed in all nuclei of the different cell types**  
811 **in the caudal fin region. n>10 embryos. Scale bar = 30µm**

812

813 **Supplementary Movie 2: Live-imaging in the caudal fin region of a stage 39-40**  
814 ***eGFP-rab11a* medaka embryo. eGFP-Rab11a is an intra-cellular trafficking marker**  
815 **and localises to intra-cellular vesicles. Notice the dynamics of vesicle trafficking in**  
816 **epithelial cells, neuromasts (magenta arrowhead) and peripheral lateral line nerve**  
817 **(yellow arrowhead). Time in minutes. n=4 embryos. Scale bar =10 µm.**

818

819 **Supplementary Movie 3: Live-imaging of skin epithelial cells in the mid-trunk region**  
820 **of a stage 39-40 *eGFP-rab11a* medaka embryo. On the left panel is a merged view of**  
821 **epithelial cells in bright-field and eGFP-Rab11a in green. On the right panel, eGFP-**  
822 **Rab11a in grey scale. eGFP-Rab11a vesicles are prominently displayed as granules**  
823 **within the cytoplasm of epithelial cells. Time in minutes n=4 embryos. Scale bar**  
824 **=10µm.**

825

826 **Supplementary Movie 4: Z-stack through the caudal fin region of a stage 39-40**  
827 ***eGFP-rab11a* medaka embryo. eGFP-Rab11a is strongly expressed in the caudal**  
828 **neuromast and peripheral lateral line nerve. And is also expressed in epithelial cells,**  
829 **the notochord, the spinal cord. n=4 embryos. Scale bar = 30µm.**

830

831 **Supplementary Movie 5: Live-imaging of stage 34-35 *g3bp1-eGFP* under normal**  
832 **conditions (temperature 21°C) reveals the cytoplasmic localisation of G3bp1-eGFP in**  
833 **epithelial and muscle cells in the mid trunk region of medaka embryos. Upon stress**  
834 **conditions (temperature shift to 34 °C, 60 minutes after the beginning of the time-**  
835 **lapse), G3bp1-eGFP localization begins to shift into localized clusters of Stress**  
836 **Granule puncta. Time in hours. n=7 embryos. Scale bar = 50µm.**

837

838 **Supplementary Movie 6:** Live-imaging of stage 34 *mNG-myosinhc* medaka embryo  
839 during muscle formation. Muscle cell growth is driven by local buckling of individual  
840 muscle cells. Muscle growth and expression of mNG-Myosinhc does not seem to be  
841 polarised in an anterior-posterior or dorsal-ventral axis. Instead muscle cells have a  
842 heterogenous expression of mNG-Myosinhc that increases as muscle cells grow in  
843 length and mature. Time in hours. n=9 embryos .Scale bar =50µm.

844

845 **Supplementary Movie 7:** Z-stack through the posterior trunk region of a stage 39-40  
846 *cdh2-eGFP* medaka embryo. Cdh2-eGFP is expressed on the cellular membranes of  
847 neuronal tissue including neuromasts, the spinal cord and the notochord. n=3 embryos.  
848 Scale bar =50 µm.

849

850 **Supplementary Movie 8:** Live-imaging of the dorsal side of a *cdh2-eGFP* medaka  
851 embryo at the 12 somite stage reveals the endogenous dynamics of Cdh2-eGFP at high  
852 temporal resolution. Time in minutes. n=2. Scale bar=30 µm.

853

854 **Supplementary Movie 9:** Live-imaging of stage 39-40 mScarlet-Pcna positive non-  
855 dividing epithelial cell nucleus (shown in Figure 4C). Intensity profiles were extracted  
856 from within the nucleus (yellow circle). The cell does not divide over the course of the  
857 time-lapse. A decrease of mScarlet-Pcna levels over time is indicative of cells in the  
858 G1 phase of the cell cycle. Time in hours. n=9 mScarlet-Pcna positive non-dividing  
859 epithelial cells. Scale bar =5 µm.

860

861 **Supplementary Movie 10:** Live-imaging of stage 39-40 mScarlet-Pcna positive  
862 epithelial cell nucleus undergoing cell division (shown in Figure 4D). Intensity profiles  
863 were extracted from within the nucleus (yellow circle). An increase of mScarlet-Pcna  
864 levels over time is indicative of cells in the S phase of the cell cycle. The appearance  
865 of nuclear speckles is indicative of cells in late S phase. The S/G2 transition is marked  
866 as the point of peak pixel intensity distribution within the nucleus (yellow circle). The  
867 sharp drop of endogenous mScarlet-Pcna levels is indicative of cells in M phase. Time  
868 in hours. n=9 mScarlet-Pcna positive and dividing epithelial cells. Scale bar =15 µm.

869

870 **Supplementary Movie 11:** Left panel: mScarlet-Pcna positive epithelial cell nucleus  
871 undergoing cell division (shown in Figure 4A). Middle panel: histogram of pixel  
872 intensity distribution of mScarlet-Pcna within the nucleus of the tracked cell. Right  
873 panel: frequency distribution width obtained from the histogram of pixel intensity  
874 distribution. Peak pixel intensity distribution is reached at 15:40h and is used to mark  
875 the S/G2 transition. Time in hours. n=9 dividing epithelial cells. Scale bar =15 µm.

876

877 **Supplementary Movie 12:** Left panel: 3D surface plot of mScarlet-Pcna positive  
878 epithelial cell nucleus undergoing cell division (from Figure 4A). Middle panel:  
879 normalized endogenous mScarlet-Pcna levels of epithelial cell (from Figure 4A). Right  
880 panel: histogram of pixel intensity distribution. Time in hours. n=9 epithelial cells that  
881 undergo cell division.

882

883 **Supplementary File S1:** Detailed protocol for cloning-free CRISPR insertion of  
884 fluorescent reporters in medaka

885

886 **Supplementary File S2:** Detailed sequence design for *mNeonGreen-HAtag-Linker-*  
887 *myosinhc* tagging

888

889 **Table 1:** Quantification of targeting efficiency

890

891 **Table S1:** Experimental and targeted *loci* details

892

893 **Table S2:** Donor templates used in this study

894

895 **Table S3:** Primers used in this study

896

897 **Table S4:** Plasmids used in this study

898

899 **Table S5:** sgRNA used in this study

900

901 **Table S6:** Medaka lines generated and maintained in this study

902

903

904

905

906

907

908

909

910

911

912

913

914

915

916

917

918

919

920

921

## 922 **Materials and Methods**

923

### 924 **Animal husbandry and ethics**

925 Medaka (*Oryzias latipes*) (Iwamatsu, 2004, Naruse et al., 2004, Kasahara et al., 2007)  
926 were maintained as closed stocks in a fish facility built according to the European  
927 Union animal welfare standards and all animal experiments were performed in  
928 accordance with European Union animal welfare guidelines. Animal experimentation  
929 was approved by The EMBL Institutional Animal Care and Use Committee (IACUC)  
930 project code: 20/001\_HD\_AA. Fishes were maintained in a constant recirculating  
931 system at 27-28°C with a 14hr light / 10hr dark cycle.

### 932 **Cloning-free CRISPR/Cas9 Knock-Ins**

933 A detailed step-by-step protocol for the cloning-free approach is provided in Files  
934 S1/S2. A detailed list of all repair donors, PCR primers, fluorescent protein sequences  
935 and sgRNAs used is provided in Tables S1-S6. Briefly, for the preparation of Cas9-  
936 mSA mRNA: the pCS2+Cas9-mSA plasmid was a gift from Janet Rossant (Addgene  
937 #103882) (Gu et al., 2018). 6-8 µg of Cas9-mSA plasmid was linearized by NotI-HF  
938 restriction enzyme (NEB #R3189S). The 8.8kb linearized fragment was cut out from a  
939 1.5% agarose gel and DNA was extracted using QIAquick Gel Extraction Kit (Qiagen  
940 #28115). *In vitro* transcription was performed using mMachine SP6 Transcription Kit  
941 (Invitrogen #AM1340) following the manufacturer's guidelines. RNA cleanup was  
942 performed using RNAeasy Mini Kit (Qiagen #74104). sgRNAs were manually selected  
943 using previously published recommendations (Paix et al., 2017a, Paix et al., 2019,  
944 Doench et al., 2016, Gagnon et al., 2014) and *in silico* validated using CCTop and  
945 CHOPCHOP (Labun et al., 2019, Stemmer et al., 2015) (Table S5). The genomic  
946 coordinates of all genes targeted can be found in Table S1. Synthetic sgRNAs used in  
947 this study were ordered from Sigma-Aldrich (spyCas9 sgRNA, 3nmole, HPLC  
948 purification, no modification). PCR repair donor fragments were prepared as described  
949 previously (Paix et al., 2014, Paix et al., 2017b, Paix et al., 2015, Paix et al., 2016) and  
950 a detailed protocol is provided in File S1. Briefly the design includes approx. 30-40bp  
951 of homology arms and a fluorescent protein sequence with no ATG or Stop codon  
952 (Tables S2/S4). PCR amplifications were performed using Phusion or Q5 high fidelity  
953 DNA polymerase (NEB Phusion Master Mix with HF buffer #M0531L or NEB Q5  
954 Master Mix # M0492L). MinElute PCR Purification Kit (Qiagen #28004) was used for  
955 PCR purification. Primers were ordered from Sigma-Aldrich (25nmole scale, desalted)  
956 and contained Biotin moiety on the 5' ends for repair donor synthesis. A list of all  
957 primers and fluorescent protein sequences used in this study can be found in Table  
958 S3/S4. The injection mix in medaka contains the sgRNA (15-20 ng/ul) + Cas9-mSA  
959 mRNA (150 ng/ul) + repair donor template (8-10 ng/ul). For injections, male and  
960 female medakas are added to the same tank and fertilized eggs collected 20 minutes  
961 later. The mix is injected in 1-cell staged medaka embryos (Iwamatsu, 2004), and  
962 embryos are raised at 28°C in 1XERM (Seleit et al., 2017a, Seleit et al., 2017b,  
963 Rembold et al., 2006). A list of KI lines generated and maintained in this study can be  
964 found in Table S6.

965

### 966 **Live-imaging sample preparation**

967 Embryos were prepared for live-imaging as previously described (Seleit et al., 2017a,  
968 Seleit et al., 2017b). 1X Tricaine (Sigma-Aldrich #A5040-25G) was used to anesthetize  
969 dechorionated medaka embryos (20 mg/ml – 20X stock solution diluted in 1XERM).  
970 Anesthetized embryos were then mounted in low melting agarose (0.6 to 1%)  
971 (Biozyme Plaque Agarose #840101). Imaging was done on glass-bottomed dishes  
972 (MatTek Corporation Ashland, MA 01721, USA). For *g3bp1-eGFP* live-imaging,  
973 temperature was changed from 21°C to 34°C after one hour of imaging.

974

### 975 **Microscopy and data analysis**

976 For all embryo screening, a Nikon SMZ18 fluorescence stereoscope was used. All live-  
977 imaging, except for *g3bp1-eGFP* and *cdh2-eGFP embryos*, was done on a laser-  
978 scanning confocal Leica SP8 (CSU, White Laser) microscope, 20x and 40x objectives  
979 were used during image acquisition depending on the experimental sample. For the  
980 SP8 confocal equipped with a white laser, the laser emission was matched to the  
981 spectral properties of the fluorescent protein of interest. *g3bp1-eGFP* line live-imaging  
982 was performed using a Zeiss LSM780 laser-scanning confocal with a temperature  
983 control box and an Argon laser at 488 nm, imaged through a 20x plan apo objective  
984 (numerical aperture 0.8). For *cdh2-eGFP* 4D live-imaging was performed on a  
985 Luxendo TruLive SPIM system using a 30X objective. Open-source standard  
986 ImageJ/Fiji software (Schindelin et al., 2012) was used for analysis and editing of all  
987 images post image acquisition. Stitching was performed using standard 2D and 3D  
988 stitching plug-ins on ImageJ/Fiji. For quantitative values on endogenous *mScarlet-*  
989 *pcna* dynamics ROI manager in ImageJ/Fiji was used to define fluorescence intensity  
990 within the nucleus of tracked cells (Yellow circle in Figure 4 and Supplementary Movie  
991 S10/11), fluorescent intensity measurements were then extracted from the time-series  
992 and the data was normalized by dividing on the initial intensity value in each time-  
993 lapse movies. Data was plotted using R software. Pixel intensity distribution within  
994 nuclei were analyzed using a custom python based script. Individual live-cell tracks  
995 were plotted using PlotTwist (Goedhart, 2020).

### 996 **Fin-clips, genotyping and sanger sequencing**

997 Individual adult F1 fishes were fin-clipped for genotyping PCRs. Briefly, fish were  
998 anesthetized in 1X Tricaine solution. A small part of the caudal fin was cut by sharp  
999 scissors and placed in a 2ml Eppendorf tube containing 50ul of fin-clip buffer. The fish  
1000 were recovered in small beakers and were transferred back to their tanks. Eppendorf  
1001 tubes were then incubated overnight at 65°C. 100ul of H<sub>2</sub>O was then added to each  
1002 tube and then the tubes were incubated for 10-15 min at 90°C. Tubes were then  
1003 centrifuged for 30 minutes at 10,000 rpm in a standard micro-centrifuge. Supernatant  
1004 was used for subsequent PCRs. Fin-clip buffer is composed of 100 ml 2M Tris pH 8.0,  
1005 5 ml 0.5M EDTA pH 8.0, 15 ml 5M NaCl, 2.5 ml 20% SDS, H<sub>2</sub>O to 500 ml, sterile  
1006 filtered. 50 ul of proteinase K (20 mg/ml) was added to 1 ml fin clip buffer before use.  
1007 2ul of genomic DNA from fin-clips was used for genotyping PCRs. A list of all

008 genotyping primers used in this study can be found in Table S3. After PCRs the edited  
009 and WT amplicons were sent to Sanger sequencing (Eurofins Genomics). Sequences  
010 were analyzed using Geneious software (Figure S2). In-frame integrations were  
011 confirmed by sequencing for *eGFP-cbx1b*, *mScarlet-pcna*, *mNeonGreen-myosinhc* and  
012 *eGFP-rab11a*. We were able to detect an internal partial duplication of the 5'  
013 homology arm in the *mScarlet-pcna* line that does not affect the protein coding  
014 sequence nor the 5' extremity of the homology arm itself. Specifically, 22 base pairs  
015 upstream of the Start codon of *pcna* (and within the 5' homology arm); we detect a 21  
016 bp partial duplication of the 5' homology arm and a 7bp insertion GGTCGAC  
017 indicative that the repair mechanism involved can lead to errors (Paix et al., 2017a).  
018 The 5' homology junction itself is unaltered and precise.

019

### 020 **Whole Genome Sequencing (WGS)**

021 5 to 10 positive F1 medaka embryos (originating from the same F0 founder) of the  
022 *eGFP-cbx1b*, *mScarlet-pcna* and *mNeonGreen-myosinhc* lines were snap frozen in  
023 liquid nitrogen and kept at -80°C in 1.5ml Eppendorf tubes. Genomic DNA was  
024 extracted using DNeasy Blood and Tissue Kit (Qiagen #69504) according to the  
025 manufacturer's guidelines. The libraries were prepared on a liquid handling system  
026 (Beckman i7 series) using 200 ng of sheared gDNA and 10 PCR cycles using the  
027 NEBNext Ultra II DNA Library Prep Kit for Illumina (NEB #E7645S). The DNA  
028 libraries were indexed with unique dual barcodes (8bp long), pooled together and then  
029 sequenced using an Illumina NextSeq550 instrument with a 150 PE mid-mode in  
030 paired-end mode with a read length of 150bp. Sequenced reads were aligned to the  
031 *Oryzias latipes* reference genome (*Ensembl!* Assembly version ASM223467v1) using  
032 BWA mem version 0.7.17 with default settings (Li and Durbin, 2009). The reference  
033 genome was augmented with the known inserts for *eGFP*, *mScarlet* and *mNeonGreen*  
034 to facilitate a direct integration discovery using standard inter-chromosomal structural  
035 variant predictions. The insert sequences are provided in Tables S2/S4. After the  
036 genome alignment, reads were sorted and indexed using SAMtools (Li et al., 2009).  
037 Quality control and coverage analyses were performed using the Alfred qc  
038 subcommand (Rausch et al., 2019). For Structural Variant (SV) discovery, aligned  
039 reads were processed with DELLY v0.8.7 (Rausch et al., 2012) using paired-end  
040 mapping and split-read analysis. SVs were filtered for inter-chromosomal SVs with  
041 one breakpoint in one of the additional insert sequences (*eGFP*, *mScarlet* and  
042 *mNeonGreen*). Plots shown in Figure S2 are adapted from Integrative Genomics  
043 Viewer (IGV) (Thorvaldsdottir et al., 2013). The estimated genomic coordinates for  
044 integration are: *eGFP-cbx1b* (chr19:19,074,552), *mScarlet-pcna* (chr9:6,554,003) and  
045 *mNeonGreen-myosinhc* (chr8:8,975,799). Coverage of *eGFP-cbx1b\_gDNA1* is 20.4X  
046 and *eGFP-cbx1b\_gDNA2* is 23.6X. Coverage of *mScarlet-pcna* is 14.4X. Coverage of  
047 *mNeonGreen-myosinhc* is 14.5X. Raw sequencing data was deposited in European  
048 Nucleotide Archive (ENA) under study number ERP127162. Accession numbers are:  
049 *eGFP-cbx1b*(1) ERS5796960 (SAMEA8109891), *eGFP-cbx1b*(2) ERS5796961  
050 (SAMEA8109892), *mScarlet-pcna* ERS5796962 (SAMEA8109893) and  
051 *mNeonGreen-myosinhc* ERS5796963 (SAMEA8109894).

052



053

## 054 **Acknowledgments**

055

056 We would like to thank all members of the Aulehla lab for the fruitful discussions on  
057 the work presented here. We would like to thank Aissam Ikmi for input on the  
058 manuscript. We would like to thank Takehito Tomita for help with python scripts. The  
059 European Molecular Biology Laboratory (EMBL) Heidelberg Genecore is  
060 acknowledged for support in WGS data acquisition and analysis. We would like to  
061 thank Vladimir Benes and members of his team at Genecore EMBL Heidelberg for  
062 continuous help and support, Tobias Rausch for computational work on the WGS data  
063 and Mireia Osuna Lopez for help in library preparation of WGS DNA. In addition, we  
064 would like to thank all animal-care takers at EMBL Heidelberg and in particular Sabine  
065 Goergens for excellent support. We would also like to thank Addgene for access to  
066 plasmids. This work was supported by: the European Molecular Biology Laboratory  
067 (EMBL), Heidelberg and the EMBL interdisciplinary Postdoc (EIPOD4) under Marie  
068 Sklodowska-Curie Actions Cofund (grant agreement number 847543) fellowship for  
069 funding to Ali Seleit. This work also received support from the European Research  
070 Council under an ERC consolidator grant agreement n.866537 to A.A.

071

072

073

## 074 **Conflict of interest**

075

076 The authors declare that they have no conflict of interest.

077

078

079

080

081

082

083

084

085

086

087

088

089

090

091

1092

1093

## References

1094

1095

ADAMS, D. S., KELLER, R. & KOEHL, M. A. 1990. The mechanics of notochord elongation, straightening and stiffening in the embryo of *Xenopus laevis*. *Development*, 110, 115-30.

1096

1097

AKITAKE, C. M., MACURAK, M., HALPERN, M. E. & GOLL, M. G. 2011. Transgenerational analysis of transcriptional silencing in zebrafish. *Dev Biol*, 352, 191-201.

1098

1099

ALUNNI, A., HERMEL, J. M., HEUZE, A., BOURRAT, F., JAMEN, F. & JOLY, J. S. 2010. Evidence for neural stem cells in the medaka optic tectum proliferation zones. *Dev Neurobiol*, 70, 693-713.

1100

1101

1102

ARAUJO, A. R., GELENS, L., SHERIFF, R. S. & SANTOS, S. D. 2016. Positive Feedback Keeps Duration of Mitosis Temporally Insulated from Upstream Cell-Cycle Events. *Mol Cell*, 64, 362-375.

1103

1104

1105

AUER, T. O. & DEL BENE, F. 2014. CRISPR/Cas9 and TALEN-mediated knock-in approaches in zebrafish. *Methods*, 69, 142-50.

1106

1107

AUER, T. O., DUROURE, K., DE CIAN, A., CONCORDET, J. P. & DEL BENE, F. 2014. Highly efficient CRISPR/Cas9-mediated knock-in in zebrafish by homology-independent DNA repair. *Genome Res*, 24, 142-53.

1108

1109

BAJAR, B. T., LAM, A. J., BADIEE, R. K., OH, Y. H., CHU, J., ZHOU, X. X., KIM, N., KIM, B. B., CHUNG, M., YABLONOVITCH, A. L., CRUZ, B. F., KULALERT, K., TAO, J. J., MEYER, T., SU, X. D. & LIN, M. Z. 2016. Fluorescent indicators for simultaneous reporting of all four cell cycle phases. *Nat Methods*, 13, 993-996.

1110

1111

1112

BARR, A. R., HELDT, F. S., ZHANG, T., BAKAL, C. & NOVAK, B. 2016. A Dynamical Framework for the All-or-None G1/S Transition. *Cell Syst*, 2, 27-37.

1113

1114

BINDELS, D. S., HAARBOSCH, L., VAN WEEREN, L., POSTMA, M., WIESE, K. E., MASTOP, M., AUMONIER, S., GOTTHARD, G., ROYANT, A., HINK, M. A. & GADELLA, T. W., JR. 2017. mScarlet: a bright monomeric red fluorescent protein for cellular imaging. *Nat Methods*, 14, 53-56.

1115

1116

1117

BUCZACKI, S. J., ZECCHINI, H. I., NICHOLSON, A. M., RUSSELL, R., VERMEULEN, L., KEMP, R. & WINTON, D. J. 2013. Intestinal label-retaining cells are secretory precursors expressing *Lgr5*. *Nature*, 495, 65-9.

1118

1119

1120

BURKET, C. T., MONTGOMERY, J. E., THUMMEL, R., KASSEN, S. C., LAFAVE, M. C., LANGENAU, D. M., ZON, L. I. & HYDE, D. R. 2008. Generation and characterization of transgenic zebrafish lines using different ubiquitous promoters. *Transgenic Res*, 17, 265-79.

1121

1122

BUTTITTA, L. A., KATZAROFF, A. J. & EDGAR, B. A. 2010. A robust cell cycle control mechanism limits E2F-induced proliferation of terminally differentiated cells in vivo. *J Cell Biol*, 189, 981-96.

1123

1124

CECCALDI, R., RONDINELLI, B. & D'ANDREA, A. D. 2016. Repair Pathway Choices and Consequences at the Double-Strand Break. *Trends Cell Biol*, 26, 52-64.

1125

1126

CENTANIN, L., ANDER, J. J., HOECKENDORF, B., LUST, K., KELLNER, T., KRAEMER, I., URBANY, C., HASEL, E., HARRIS, W. A., SIMONS, B. D. & WITTBRODT, J. 2014. Exclusive multipotency and preferential asymmetric divisions in post-embryonic neural stem cells of the fish retina. *Development*, 141, 3472-82.

1127

1128

CHOPRA, A., TABDANOV, E., PATEL, H., JANMEY, P. A. & KRESH, J. Y. 2011. Cardiac myocyte remodeling mediated by N-cadherin-dependent mechanosensing. *Am J Physiol Heart Circ Physiol*, 300, H1252-66.

1129

1130

CHUDAKOV, D. M., MATZ, M. V., LUKYANOV, S. & LUKYANOV, K. A. 2010. Fluorescent proteins and their applications in imaging living cells and tissues. *Physiol Rev*, 90, 1103-63.

1131

1132

CONG, L., RAN, F. A., COX, D., LIN, S., BARRETTO, R., HABIB, N., HSU, P. D., WU, X., JIANG, W., MARRAFFINI, L. A. & ZHANG, F. 2013. Multiplex genome engineering using CRISPR/Cas systems. *Science*, 339, 819-23.

1133

1134

1135

1136

1137

1138

1139

1140

1141

1142

- 143 CRISTEA, S., FREYVERT, Y., SANTIAGO, Y., HOLMES, M. C., URNOV, F. D., GREGORY, P.  
144 D. & COST, G. J. 2013. In vivo cleavage of transgene donors promotes nuclease-mediated  
145 targeted integration. *Biotechnol Bioeng*, 110, 871-80.
- 146 CULLEN, P. J. & STEINBERG, F. 2018. To degrade or not to degrade: mechanisms and significance  
147 of endocytic recycling. *Nat Rev Mol Cell Biol*, 19, 679-696.
- 148 DANNER, E., BASHIR, S., YUMLU, S., WURST, W., WEFERS, B. & KUHN, R. 2017. Control of  
149 gene editing by manipulation of DNA repair mechanisms. *Mamm Genome*, 28, 262-274.
- 150 DECKER, C. J. & PARKER, R. 2012. P-bodies and stress granules: possible roles in the control of  
151 translation and mRNA degradation. *Cold Spring Harb Perspect Biol*, 4, a012286.
- 152 DESCLOZEAUX, M., VENTURATO, J., WYLIE, F. G., KAY, J. G., JOSEPH, S. R., LE, H. T. &  
153 STOW, J. L. 2008. Active Rab11 and functional recycling endosome are required for E-  
154 cadherin trafficking and lumen formation during epithelial morphogenesis. *Am J Physiol Cell*  
155 *Physiol*, 295, C545-56.
- 156 DICKINSON, D. J., PANI, A. M., HEPPELT, J. K., HIGGINS, C. D. & GOLDSTEIN, B. 2015.  
157 Streamlined Genome Engineering with a Self-Excising Drug Selection Cassette. *Genetics*,  
158 200, 1035-49.
- 159 DOENCH, J. G., FUSI, N., SULLENDER, M., HEGDE, M., VAIMBERG, E. W., DONOVAN, K.  
160 F., SMITH, I., TOTHOVA, Z., WILEN, C., ORCHARD, R., VIRGIN, H. W.,  
161 LISTGARTEN, J. & ROOT, D. E. 2016. Optimized sgRNA design to maximize activity and  
162 minimize off-target effects of CRISPR-Cas9. *Nat Biotechnol*, 34, 184-191.
- 163 DOLFI, L., RIPA, R., ANTEBI, A., VALENZANO, D. R. & CELLERINO, A. 2019. Cell cycle  
164 dynamics during diapause entry and exit in an annual killifish revealed by FUCCI technology.  
165 *Evodevo*, 10, 29.
- 166 DUFOURCQ, P., ROUSSIGNE, M., BLADER, P., ROSA, F., PEYRIERAS, N. & VRIZ, S. 2006.  
167 Mechano-sensory organ regeneration in adults: the zebrafish lateral line as a model. *Mol Cell*  
168 *Neurosci*, 33, 180-7.
- 169 FU, Y., FODEN, J. A., KHAYTER, C., MAEDER, M. L., REYON, D., JOUNG, J. K. & SANDER,  
170 J. D. 2013. High-frequency off-target mutagenesis induced by CRISPR-Cas nucleases in  
171 human cells. *Nat Biotechnol*, 31, 822-6.
- 172 GAGNON, J. A., VALEN, E., THYME, S. B., HUANG, P., AKHMETOVA, L., PAULI, A.,  
173 MONTAGUE, T. G., ZIMMERMAN, S., RICHTER, C. & SCHIER, A. F. 2014. Efficient  
174 mutagenesis by Cas9 protein-mediated oligonucleotide insertion and large-scale assessment  
175 of single-guide RNAs. *PLoS One*, 9, e98186.
- 176 GARCIA, J., BAGWELL, J., NJAINE, B., NORMAN, J., LEVIC, D. S., WOPAT, S., MILLER, S.  
177 E., LIU, X., LOCASALE, J. W., STAINIER, D. Y. R. & BAGNAT, M. 2017. Sheath Cell  
178 Invasion and Trans-differentiation Repair Mechanical Damage Caused by Loss of Caveolae  
179 in the Zebrafish Notochord. *Curr Biol*, 27, 1982-1989 e3.
- 180 GIBSON, T. J., SEILER, M. & VEITIA, R. A. 2013. The transience of transient overexpression. *Nat*  
181 *Methods*, 10, 715-21.
- 182 GILMORE, J. M., SARDIU, M. E., GROPE, B. D., THORNTON, J. L., LIU, X., DAYEBGADOH,  
183 G., BANKS, C. A., SLAUGHTER, B. D., UNRUH, J. R., WORKMAN, J. L., FLORENS, L.  
184 & WASHBURN, M. P. 2016. WDR76 Co-Localizes with Heterochromatin Related Proteins  
185 and Rapidly Responds to DNA Damage. *PLoS One*, 11, e0155492.
- 186 GOEDHART, J. 2020. PlotTwist: A web app for plotting and annotating continuous data. *PLoS Biol*,  
187 18, e3000581.
- 188 GOLL, M. G., ANDERSON, R., STAINIER, D. Y., SPRADLING, A. C. & HALPERN, M. E. 2009.  
189 Transcriptional silencing and reactivation in transgenic zebrafish. *Genetics*, 182, 747-55.
- 190 GRATZ, S. J., UKKEN, F. P., RUBINSTEIN, C. D., THIEDE, G., DONOHUE, L. K., CUMMINGS,  
191 A. M. & O'CONNOR-GILES, K. M. 2014. Highly specific and efficient CRISPR/Cas9-  
192 catalyzed homology-directed repair in Drosophila. *Genetics*, 196, 961-71.
- 193 GU, B., POSFAI, E. & ROSSANT, J. 2018. Efficient generation of targeted large insertions by  
194 microinjection into two-cell-stage mouse embryos. *Nat Biotechnol*, 36, 632-637.

- 195 GUARINO, A. M., MAURO, G. D., RUGGIERO, G., GEYER, N., DELICATO, A., FOULKES, N.  
196 S., VALLONE, D. & CALABRO, V. 2019. YB-1 recruitment to stress granules in zebrafish  
197 cells reveals a differential adaptive response to stress. *Sci Rep*, 9, 9059.
- 198 GUTIERREZ-TRIANA, J. A., TAVHELIDSE, T., THUMBERGER, T., THOMAS, I.,  
199 WITTBRODT, B., KELLNER, T., ANLAS, K., TSINGOS, E. & WITTBRODT, J. 2018.  
200 Efficient single-copy HDR by 5' modified long dsDNA donors. *Elife*, 7.
- 201 HACKETT, C. S., GEURTS, A. M. & HACKETT, P. B. 2007. Predicting preferential DNA vector  
202 insertion sites: implications for functional genomics and gene therapy. *Genome Biol*, 8 Suppl  
203 1, S12.
- 204 HALBLEIB, J. M. & NELSON, W. J. 2006. Cadherins in development: cell adhesion, sorting, and  
205 tissue morphogenesis. *Genes Dev*, 20, 3199-214.
- 206 HARRINGTON, M. J., HONG, E., FASANMI, O. & BREWSTER, R. 2007. Cadherin-mediated  
207 adhesion regulates posterior body formation. *BMC Dev Biol*, 7, 130.
- 208 HARTMAN, M. A. & SPUDICH, J. A. 2012. The myosin superfamily at a glance. *J Cell Sci*, 125,  
209 1627-32.
- 210 HELD, M., SCHMITZ, M. H., FISCHER, B., WALTER, T., NEUMANN, B., OLMA, M. H.,  
211 PETER, M., ELLENBERG, J. & GERLICH, D. W. 2010. CellCognition: time-resolved  
212 phenotype annotation in high-throughput live cell imaging. *Nat Methods*, 7, 747-54.
- 213 HISANO, Y., SAKUMA, T., NAKADE, S., OHGA, R., OTA, S., OKAMOTO, H., YAMAMOTO,  
214 T. & KAWAHARA, A. 2015. Precise in-frame integration of exogenous DNA mediated by  
215 CRISPR/Cas9 system in zebrafish. *Sci Rep*, 5, 8841.
- 216 HOSHIJIMA, K., JURYNEC, M. J. & GRUNWALD, D. J. 2016. Precise Editing of the Zebrafish  
217 Genome Made Simple and Efficient. *Dev Cell*, 36, 654-67.
- 218 HOSHIJIMA, K., JURYNEC, M. J., KLATT SHAW, D., JACOBI, A. M., BEHLKE, M. A. &  
219 GRUNWALD, D. J. 2019. Highly Efficient CRISPR-Cas9-Based Methods for Generating  
220 Deletion Mutations and F0 Embryos that Lack Gene Function in Zebrafish. *Dev Cell*, 51, 645-  
221 657 e4.
- 222 IRVINE, K., STIRLING, R., HUME, D. & KENNEDY, D. 2004. Rasputin, more promiscuous than  
223 ever: a review of G3BP. *Int J Dev Biol*, 48, 1065-77.
- 224 IWAMATSU, T. 2004. Stages of normal development in the medaka *Oryzias latipes*. *Mech Dev*, 121,  
225 605-18.
- 226 JASIN, M. & HABER, J. E. 2016. The democratization of gene editing: Insights from site-specific  
227 cleavage and double-strand break repair. *DNA Repair (Amst)*, 44, 6-16.
- 228 JINEK, M., CHYLINSKI, K., FONFARA, I., HAUER, M., DOUDNA, J. A. & CHARPENTIER, E.  
229 2012. A programmable dual-RNA-guided DNA endonuclease in adaptive bacterial immunity.  
230 *Science*, 337, 816-21.
- 231 JONES, J. E. & CORWIN, J. T. 1993. Replacement of lateral line sensory organs during tail  
232 regeneration in salamanders: identification of progenitor cells and analysis of leukocyte  
233 activity. *J Neurosci*, 13, 1022-34.
- 234 KANCA, O., ZIRIN, J., GARCIA-MARQUES, J., KNIGHT, S. M., YANG-ZHOU, D., AMADOR,  
235 G., CHUNG, H., ZUO, Z., MA, L., HE, Y., LIN, W. W., FANG, Y., GE, M., YAMAMOTO,  
236 S., SCHULZE, K. L., HU, Y., SPRADLING, A. C., MOHR, S. E., PERRIMON, N. &  
237 BELLEN, H. J. 2019. An efficient CRISPR-based strategy to insert small and large fragments  
238 of DNA using short homology arms. *Elife*, 8.
- 239 KASAHARA, M., NARUSE, K., SASAKI, S., NAKATANI, Y., QU, W., AHSAN, B., YAMADA,  
240 T., NAGAYASU, Y., DOI, K., KASAI, Y., JINDO, T., KOBAYASHI, D., SHIMADA, A.,  
241 TOYODA, A., KUROKI, Y., FUJIYAMA, A., SASAKI, T., SHIMIZU, A., ASAKAWA, S.,  
242 SHIMIZU, N., HASHIMOTO, S., YANG, J., LEE, Y., MATSUSHIMA, K., SUGANO, S.,  
243 SAKAIZUMI, M., NARITA, T., OHISHI, K., HAGA, S., OHTA, F., NOMOTO, H.,  
244 NOGATA, K., MORISHITA, T., ENDO, T., SHIN, I. T., TAKEDA, H., MORISHITA, S. &  
245 KOHARA, Y. 2007. The medaka draft genome and insights into vertebrate genome evolution.  
246 *Nature*, 447, 714-9.

- 247 KIM, J. H., LEE, S. R., LI, L. H., PARK, H. J., PARK, J. H., LEE, K. Y., KIM, M. K., SHIN, B. A.  
248 & CHOI, S. Y. 2011. High cleavage efficiency of a 2A peptide derived from porcine  
249 teschovirus-1 in human cell lines, zebrafish and mice. *PLoS One*, 6, e18556.
- 250 KROLL, F., POWELL, G. T., GHOSH, M., GESTRI, G., ANTINUCCI, P., HEARN, T. J.,  
251 TUNBAK, H., LIM, S., DENNIS, H. W., FERNANDEZ, J. M., WHITMORE, D., DREOSTI,  
252 E., WILSON, S. W., HOFFMAN, E. J. & RIHEL, J. 2021. A simple and effective F0 knockout  
253 method for rapid screening of behaviour and other complex phenotypes. *Elife*, 10.
- 254 KUO, C. T., YOU, G. T., JIAN, Y. J., CHEN, T. S., SIAO, Y. C., HSU, A. L. & CHING, T. T. 2020.  
255 AMPK-mediated formation of stress granules is required for dietary restriction-induced  
256 longevity in *Caenorhabditis elegans*. *Aging Cell*, 19, e13157.
- 257 LABUN, K., MONTAGUE, T. G., KRAUSE, M., TORRES CLEUREN, Y. N., TJELDNE, H. &  
258 VALEN, E. 2019. CHOPCHOP v3: expanding the CRISPR web toolbox beyond genome  
259 editing. *Nucleic Acids Res*, 47, W171-W174.
- 260 LAVKER, R. M. & SUN, T. T. 2003. Epithelial stem cells: the eye provides a vision. *Eye (Lond)*, 17,  
261 937-42.
- 262 LECKBAND, D. E. & DE ROOIJ, J. 2014. Cadherin adhesion and mechanotransduction. *Annu Rev*  
263 *Cell Dev Biol*, 30, 291-315.
- 264 LEONETTI, M. D., SEKINE, S., KAMIYAMA, D., WEISSMAN, J. S. & HUANG, B. 2016. A  
265 scalable strategy for high-throughput GFP tagging of endogenous human proteins. *Proc Natl*  
266 *Acad Sci U S A*, 113, E3501-8.
- 267 LEONHARDT, H., RAHN, H. P., WEINZIERL, P., SPORBERT, A., CREMER, T., ZINK, D. &  
268 CARDOSO, M. C. 2000. Dynamics of DNA replication factories in living cells. *J Cell Biol*,  
269 149, 271-80.
- 270 LEUNG, L., KLOPPER, A. V., GRILL, S. W., HARRIS, W. A. & NORDEN, C. 2011. Apical  
271 migration of nuclei during G2 is a prerequisite for all nuclear motion in zebrafish  
272 neuroepithelia. *Development*, 138, 5003-13.
- 273 LEVIC, D. S., YAMAGUCHI, N., WANG, S., KNAUT, H. & BAGNAT, M. 2021. Knock-in tagging  
274 in zebrafish facilitated by insertion into non-coding regions. *bioRxiv*, 2021.07.08.451679.
- 275 LI, H. & DURBIN, R. 2009. Fast and accurate short read alignment with Burrows-Wheeler transform.  
276 *Bioinformatics*, 25, 1754-60.
- 277 LI, H., HANDSAKER, B., WYSOKER, A., FENNEL, T., RUAN, J., HOMER, N., MARTH, G.,  
278 ABECASIS, G., DURBIN, R. & GENOME PROJECT DATA PROCESSING, S. 2009. The  
279 Sequence Alignment/Map format and SAMtools. *Bioinformatics*, 25, 2078-9.
- 280 LI, W., ZHANG, Y., HAN, B., LI, L., LI, M., LU, X., CHEN, C., LU, M., ZHANG, Y., JIA, X.,  
281 ZHU, Z., TONG, X. & ZHANG, B. 2019. One-step efficient generation of dual-function  
282 conditional knockout and geno-tagging alleles in zebrafish. *Elife*, 8.
- 283 LIM, Y. W., LO, H. P., FERGUSON, C., MARTEL, N., GIACOMOTTO, J., GOMEZ, G. A., YAP,  
284 A. S., HALL, T. E. & PARTON, R. G. 2017. Caveolae Protect Notochord Cells against  
285 Catastrophic Mechanical Failure during Development. *Curr Biol*, 27, 1968-1981 e7.
- 286 LISBY, M. & ROTHSTEIN, R. 2004. DNA damage checkpoint and repair centers. *Curr Opin Cell*  
287 *Biol*, 16, 328-34.
- 288 LOISON, O., WEITKUNAT, M., KAYA-COPUR, A., NASCIMENTO ALVES, C., MATZAT, T.,  
289 SPLETTER, M. L., LUSCHNIG, S., BRASSELET, S., LENNE, P. F. & SCHNORRER, F.  
290 2018. Polarization-resolved microscopy reveals a muscle myosin motor-independent  
291 mechanism of molecular actin ordering during sarcomere maturation. *PLoS Biol*, 16,  
292 e2004718.
- 293 LOMBERK, G., WALLRATH, L. & URRUTIA, R. 2006. The Heterochromatin Protein 1 family.  
294 *Genome Biol*, 7, 228.
- 295 LU, C. P., POLAK, L., ROCHA, A. S., PASOLLI, H. A., CHEN, S. C., SHARMA, N., BLANPAIN,  
296 C. & FUCHS, E. 2012. Identification of stem cell populations in sweat glands and ducts  
297 reveals roles in homeostasis and wound repair. *Cell*, 150, 136-50.

- 298 LUIJSTERBURG, M. S., DINANT, C., LANS, H., STAP, J., WIERNASZ, E., LAGERWERF, S.,  
299 WARMERDAM, D. O., LINDH, M., BRINK, M. C., DOBRUCKI, J. W., ATEN, J. A.,  
300 FOUSTERI, M. I., JANSEN, G., DANTUMA, N. P., VERMEULEN, W., MULLENDERS,  
301 L. H., HOUTSMULLER, A. B., VERSCHURE, P. J. & VAN DRIEL, R. 2009.  
302 Heterochromatin protein 1 is recruited to various types of DNA damage. *J Cell Biol*, 185, 577-  
303 86.
- 304 MAGA, G. & HUBSCHER, U. 2003. Proliferating cell nuclear antigen (PCNA): a dancer with many  
305 partners. *J Cell Sci*, 116, 3051-60.
- 306 MAILAND, N., GIBBS-SEYMOUR, I. & BEKKER-JENSEN, S. 2013. Regulation of PCNA-protein  
307 interactions for genome stability. *Nat Rev Mol Cell Biol*, 14, 269-82.
- 308 MOLDOVAN, G. L., PFANDER, B. & JENTSCH, S. 2007. PCNA, the maestro of the replication  
309 fork. *Cell*, 129, 665-79.
- 310 NARUSE, K., HORI, H., SHIMIZU, N., KOHARA, Y. & TAKEDA, H. 2004. Medaka genomics: a  
311 bridge between mutant phenotype and gene function. *Mech Dev*, 121, 619-28.
- 312 NGUYEN, V., DESCHET, K., HENRICH, T., GODET, E., JOLY, J. S., WITTBRODT, J.,  
313 CHOURROUT, D. & BOURRAT, F. 1999. Morphogenesis of the optic tectum in the medaka  
314 (*Oryzias latipes*): a morphological and molecular study, with special emphasis on cell  
315 proliferation. *J Comp Neurol*, 413, 385-404.
- 316 NIELSEN, A. L., OULAD-ABDELGHANI, M., ORTIZ, J. A., REMBOUTSIKA, E., CHAMBON,  
317 P. & LOSSON, R. 2001. Heterochromatin formation in mammalian cells: interaction between  
318 histones and HP1 proteins. *Mol Cell*, 7, 729-39.
- 319 NOWAK, J. A. & FUCHS, E. 2009. Isolation and culture of epithelial stem cells. *Methods Mol Biol*,  
320 482, 215-32.
- 321 NOWAK, J. A., POLAK, L., PASOLLI, H. A. & FUCHS, E. 2008. Hair follicle stem cells are  
322 specified and function in early skin morphogenesis. *Cell Stem Cell*, 3, 33-43.
- 323 OKI, T., NISHIMURA, K., KITaura, J., TOGAMI, K., MAEHARA, A., IZAWA, K., SAKAUE-  
324 SAWANO, A., NIIDA, A., MIYANO, S., ABURATANI, H., KIYONARI, H., MIYAWAKI,  
325 A. & KITAMURA, T. 2014. A novel cell-cycle-indicator, mVenus-p27K-, identifies  
326 quiescent cells and visualizes G0-G1 transition. *Sci Rep*, 4, 4012.
- 327 OTA, S., HISANO, Y., IKAWA, Y. & KAWAHARA, A. 2014. Multiple genome modifications by  
328 the CRISPR/Cas9 system in zebrafish. *Genes Cells*, 19, 555-64.
- 329 PAIX, A., FOLKMANN, A., GOLDMAN, D. H., KULAGA, H., GRZELAK, M. J., RASOLOSON,  
330 D., PAIDEMARRY, S., GREEN, R., REED, R. R. & SEYDOUX, G. 2017a. Precision  
331 genome editing using synthesis-dependent repair of Cas9-induced DNA breaks. *Proc Natl*  
332 *Acad Sci U S A*, 114, E10745-E10754.
- 333 PAIX, A., FOLKMANN, A., RASOLOSON, D. & SEYDOUX, G. 2015. High Efficiency,  
334 Homology-Directed Genome Editing in *Caenorhabditis elegans* Using CRISPR-Cas9  
335 Ribonucleoprotein Complexes. *Genetics*, 201, 47-54.
- 336 PAIX, A., FOLKMANN, A. & SEYDOUX, G. 2017b. Precision genome editing using CRISPR-  
337 Cas9 and linear repair templates in *C. elegans*. *Methods*, 121-122, 86-93.
- 338 PAIX, A., RASOLOSON, D., FOLKMANN, A. & SEYDOUX, G. 2019. Rapid Tagging of Human  
339 Proteins with Fluorescent Reporters by Genome Engineering using Double-Stranded DNA  
340 Donors. *Curr Protoc Mol Biol*, 129, e102.
- 341 PAIX, A., SCHMIDT, H. & SEYDOUX, G. 2016. Cas9-assisted recombineering in *C. elegans*:  
342 genome editing using in vivo assembly of linear DNAs. *Nucleic Acids Res*, 44, e128.
- 343 PAIX, A., WANG, Y., SMITH, H. E., LEE, C. Y., CALIDAS, D., LU, T., SMITH, J., SCHMIDT,  
344 H., KRAUSE, M. W. & SEYDOUX, G. 2014. Scalable and versatile genome editing using  
345 linear DNAs with microhomology to Cas9 Sites in *Caenorhabditis elegans*. *Genetics*, 198,  
346 1347-56.
- 347 PINTO-TEIXEIRA, F., VIADER-LLARGUES, O., TORRES-MEJIA, E., TURAN, M.,  
348 GONZALEZ-GUALDA, E., POLA-MORELL, L. & LOPEZ-SCHIER, H. 2015.  
349 Inexhaustible hair-cell regeneration in young and aged zebrafish. *Biol Open*, 4, 903-9.

- 350 PIWKO, W., OLMA, M. H., HELD, M., BIANCO, J. N., PEDRIOLI, P. G., HOFMANN, K.,  
351 PASERO, P., GERLICH, D. W. & PETER, M. 2010. RNAi-based screening identifies the  
352 Mms22L-Nfkbil2 complex as a novel regulator of DNA replication in human cells. *EMBO J*,  
353 29, 4210-22.
- 354 PROTTER, D. S. W. & PARKER, R. 2016. Principles and Properties of Stress Granules. *Trends Cell*  
355 *Biol*, 26, 668-679.
- 356 RAUSCH, T., HSI-YANG FRITZ, M., KORBEL, J. O. & BENES, V. 2019. Alfred: interactive multi-  
357 sample BAM alignment statistics, feature counting and feature annotation for long- and short-  
358 read sequencing. *Bioinformatics*, 35, 2489-2491.
- 359 RAUSCH, T., ZICHNER, T., SCHLATT, A., STUTZ, A. M., BENES, V. & KORBEL, J. O. 2012.  
360 DELLY: structural variant discovery by integrated paired-end and split-read analysis.  
361 *Bioinformatics*, 28, i333-i339.
- 362 REMBOLD, M., LAHIRI, K., FOULKES, N. S. & WITTBRODT, J. 2006. Transgenesis in fish:  
363 efficient selection of transgenic fish by co-injection with a fluorescent reporter construct. *Nat*  
364 *Protoc*, 1, 1133-9.
- 365 RHEE, H., POLAK, L. & FUCHS, E. 2006. Lhx2 maintains stem cell character in hair follicles.  
366 *Science*, 312, 1946-9.
- 367 ROMERO-CARVAJAL, A., NAVAJAS ACEDO, J., JIANG, L., KOZLOVSKAJA-GUMBRIENE,  
368 A., ALEXANDER, R., LI, H. & PIOTROWSKI, T. 2015. Regeneration of Sensory Hair Cells  
369 Requires Localized Interactions between the Notch and Wnt Pathways. *Dev Cell*, 34, 267-82.
- 370 SAKAUE-SAWANO, A., KUROKAWA, H., MORIMURA, T., HANYU, A., HAMA, H., OSAWA,  
371 H., KASHIWAGI, S., FUKAMI, K., MIYATA, T., MIYOSHI, H., IMAMURA, T.,  
372 OGAWA, M., MASAI, H. & MIYAWAKI, A. 2008. Visualizing spatiotemporal dynamics of  
373 multicellular cell-cycle progression. *Cell*, 132, 487-98.
- 374 SANTOS, A., WERNERSSON, R. & JENSEN, L. J. 2015. Cyclebase 3.0: a multi-organism database  
375 on cell-cycle regulation and phenotypes. *Nucleic Acids Res*, 43, D1140-4.
- 376 SCHINDELIN, J., ARGANDA-CARRERAS, I., FRISE, E., KAYNIG, V., LONGAIR, M.,  
377 PIETZSCH, T., PREIBISCH, S., RUEDEN, C., SAALFELD, S., SCHMID, B., TINEVEZ,  
378 J. Y., WHITE, D. J., HARTENSTEIN, V., ELICEIRI, K., TOMANCAK, P. & CARDONA,  
379 A. 2012. Fiji: an open-source platform for biological-image analysis. *Nat Methods*, 9, 676-82.
- 380 SELEIT, A., GROSS, K., ONISTSCHENKO, J., WOELK, M., AUTORINO, C. & CENTANIN, L.  
381 2020. Development and regeneration dynamics of the Medaka notochord. *Dev Biol*, 463, 11-  
382 25.
- 383 SELEIT, A., KRAMER, I., AMBROSIO, E., DROSS, N., ENGEL, U. & CENTANIN, L. 2017a.  
384 Sequential organogenesis sets two parallel sensory lines in medaka. *Development*, 144, 687-  
385 697.
- 386 SELEIT, A., KRAMER, I., RIEBESEHL, B. F., AMBROSIO, E. M., STOLPER, J. S., LISCHIK, C.  
387 Q., DROSS, N. & CENTANIN, L. 2017b. Neural stem cells induce the formation of their  
388 physical niche during organogenesis. *Elife*, 6.
- 389 SELLERS, J. R. 2000. Myosins: a diverse superfamily. *Biochim Biophys Acta*, 1496, 3-22.
- 390 SHANER, N. C., LAMBERT, G. G., CHAMMAS, A., NI, Y., CRANFILL, P. J., BAIRD, M. A.,  
391 SELL, B. R., ALLEN, J. R., DAY, R. N., ISRAELSSON, M., DAVIDSON, M. W. & WANG,  
392 J. 2013. A bright monomeric green fluorescent protein derived from Branchiostoma  
393 lanceolatum. *Nat Methods*, 10, 407-9.
- 394 SHIN, J., CHEN, J. & SOLNICA-KREZEL, L. 2014. Efficient homologous recombination-mediated  
395 genome engineering in zebrafish using TALE nucleases. *Development*, 141, 3807-18.
- 396 SNIPPETT, H. J., VAN DER FLIER, L. G., SATO, T., VAN ES, J. H., VAN DEN BORN, M.,  
397 KROON-VEENBOER, C., BARKER, N., KLEIN, A. M., VAN RHEENEN, J., SIMONS, B.  
398 D. & CLEVERS, H. 2010. Intestinal crypt homeostasis results from neutral competition  
399 between symmetrically dividing Lgr5 stem cells. *Cell*, 143, 134-44.

- 400 STEMMER, M., THUMBERGER, T., DEL SOL KEYER, M., WITTBRODT, J. & MATEO, J. L.  
401 2015. CCTop: An Intuitive, Flexible and Reliable CRISPR/Cas9 Target Prediction Tool.  
402 *PLoS One*, 10, e0124633.
- 403 STENMARK, H. 2009. Rab GTPases as coordinators of vesicle traffic. *Nat Rev Mol Cell Biol*, 10,  
404 513-25.
- 405 STOLPER, J., AMBROSIO, E. M., DANCIU, D. P., BUONO, L., ELLIOTT, D. A., NARUSE, K.,  
406 MARTINEZ-MORALES, J. R., MARCINIAK-CZOCHRA, A. & CENTANIN, L. 2019.  
407 Stem cell topography splits growth and homeostatic functions in the fish gill. *Elife*, 8.
- 408 STUART, G. W., VIELKIND, J. R., MCMURRAY, J. V. & WESTERFIELD, M. 1990. Stable lines  
409 of transgenic zebrafish exhibit reproducible patterns of transgene expression. *Development*,  
410 109, 577-84.
- 411 SUGIYAMA, M., SAKAUE-SAWANO, A., IIMURA, T., FUKAMI, K., KITAGUCHI, T.,  
412 KAWAKAMI, K., OKAMOTO, H., HIGASHIJIMA, S. & MIYAWAKI, A. 2009.  
413 Illuminating cell-cycle progression in the developing zebrafish embryo. *Proc Natl Acad Sci*  
414 *U S A*, 106, 20812-7.
- 415 SUZUKI, S. C. & TAKEICHI, M. 2008. Cadherins in neuronal morphogenesis and function. *Dev*  
416 *Growth Differ*, 50 Suppl 1, S119-30.
- 417 TAYLOR, K. C., BUVOLI, M., KORKMAZ, E. N., BUVOLI, A., ZHENG, Y., HEINZE, N. T.,  
418 CUI, Q., LEINWAND, L. A. & RAYMENT, I. 2015. Skip residues modulate the structural  
419 properties of the myosin rod and guide thick filament assembly. *Proc Natl Acad Sci U S A*,  
420 112, E3806-15.
- 421 THACKER, S. A., BONNETTE, P. C. & DURONIO, R. J. 2003. The contribution of E2F-regulated  
422 transcription to Drosophila PCNA gene function. *Curr Biol*, 13, 53-8.
- 423 THORVALDSDOTTIR, H., ROBINSON, J. T. & MESIROV, J. P. 2013. Integrative Genomics  
424 Viewer (IGV): high-performance genomics data visualization and exploration. *Brief*  
425 *Bioinform*, 14, 178-92.
- 426 TSINGOS, E., HOCKENDORF, B., SUTTERLIN, T., KIRCHMAIER, S., GRABE, N.,  
427 CENTANIN, L. & WITTBRODT, J. 2019. Retinal stem cells modulate proliferative  
428 parameters to coordinate post-embryonic morphogenesis in the eye of fish. *Elife*, 8.
- 429 WADA, H., DAMBLY-CHAUDIERE, C., KAWAKAMI, K. & GHYSEN, A. 2013. Innervation is  
430 required for sense organ development in the lateral line system of adult zebrafish. *Proc Natl*  
431 *Acad Sci U S A*, 110, 5659-64.
- 432 WANG, H., LA RUSSA, M. & QI, L. S. 2016. CRISPR/Cas9 in Genome Editing and Beyond. *Annu*  
433 *Rev Biochem*, 85, 227-64.
- 434 WELZ, T., WELLBOURNE-WOOD, J. & KERKHOFF, E. 2014. Orchestration of cell surface  
435 proteins by Rab11. *Trends Cell Biol*, 24, 407-15.
- 436 WHEELER, J. R., MATHENY, T., JAIN, S., ABRISCH, R. & PARKER, R. 2016. Distinct stages in  
437 stress granule assembly and disassembly. *Elife*, 5.
- 438 WIERSON, W. A., SIMONE, B. W., WAREJONCAS, Z., MANN, C., WELKER, J. M., KAR, B.,  
439 EMCH, M. J., FRIEDBERG, I., GENDRON, W. A. C., BARRY, M. A., CLARK, K. J.,  
440 DOBBS, D. L., MCGRAIL, M. A., EKKER, S. C. & ESSNER, J. J. 2019. Expanding the  
441 CRISPR Toolbox with ErCas12a in Zebrafish and Human Cells. *CRISPR J*, 2, 417-433.
- 442 WIERSON, W. A., WELKER, J. M., ALMEIDA, M. P., MANN, C. M., WEBSTER, D. A., TORRIE,  
443 M. E., WEISS, T. J., KAMBAKAM, S., VOLLBRECHT, M. K., LAN, M., MCKEIGHAN,  
444 K. C., LEVEY, J., MING, Z., WEHMEIER, A., MIKELSON, C. S., HALTOM, J. A.,  
445 KWAN, K. M., CHIEN, C. B., BALCIUNAS, D., EKKER, S. C., CLARK, K. J., WEBBER,  
446 B. R., MORIARITY, B. S., SOLIN, S. L., CARLSON, D. F., DOBBS, D. L., MCGRAIL, M.  
447 & ESSNER, J. 2020. Efficient targeted integration directed by short homology in zebrafish  
448 and mammalian cells. *Elife*, 9.
- 449 WINKLER, C., VIELKIND, J. R. & SCHARTL, M. 1991. Transient expression of foreign DNA  
450 during embryonic and larval development of the medaka fish (*Oryzias latipes*). *Mol Gen*  
451 *Genet*, 226, 129-40.



- 1452 WON, M. & DAWID, I. B. 2017. PCR artifact in testing for homologous recombination in genomic  
1453 editing in zebrafish. *PLoS One*, 12, e0172802.
- 1454 YAMAGUCHI, M., HAYASHI, Y., NISHIMOTO, Y., HIROSE, F. & MATSUKAGE, A. 1995. A  
1455 nucleotide sequence essential for the function of DRE, a common promoter element for  
1456 *Drosophila* DNA replication-related genes. *J Biol Chem*, 270, 15808-14.
- 1457 YAN, B. W., ZHAO, Y. F., CAO, W. G., LI, N. & GOU, K. M. 2013. Mechanism of random  
1458 integration of foreign DNA in transgenic mice. *Transgenic Res*, 22, 983-92.
- 1459 YANG, P., MATHIEU, C., KOLAITIS, R. M., ZHANG, P., MESSING, J., YURTSEVER, U.,  
1460 YANG, Z., WU, J., LI, Y., PAN, Q., YU, J., MARTIN, E. W., MITTAG, T., KIM, H. J. &  
1461 TAYLOR, J. P. 2020. G3BP1 Is a Tunable Switch that Triggers Phase Separation to Assemble  
1462 Stress Granules. *Cell*, 181, 325-345 e28.
- 1463 YAO, X., WANG, X., HU, X., LIU, Z., LIU, J., ZHOU, H., SHEN, X., WEI, Y., HUANG, Z., YING,  
1464 W., WANG, Y., NIE, Y. H., ZHANG, C. C., LI, S., CHENG, L., WANG, Q., WU, Y.,  
1465 HUANG, P., SUN, Q., SHI, L. & YANG, H. 2017. Homology-mediated end joining-based  
1466 targeted integration using CRISPR/Cas9. *Cell Res*, 27, 801-814.
- 1467 YOSHIMI, K., KUNIHITO, Y., KANEKO, T., NAGAHORA, H., VOIGT, B. & MASHIMO, T.  
1468 2016. ssODN-mediated knock-in with CRISPR-Cas for large genomic regions in zygotes. *Nat*  
1469 *Commun*, 7, 10431.
- 1470 ZERJATKE, T., GAK, I. A., KIROVA, D., FUHRMANN, M., DANIEL, K., GONCIARZ, M.,  
1471 MULLER, D., GLAUCHE, I. & MANSFELD, J. 2017. Quantitative Cell Cycle Analysis  
1472 Based on an Endogenous All-in-One Reporter for Cell Tracking and Classification. *Cell Rep*,  
1473 19, 1953-1966.
- 1474 ZU, Y., TONG, X., WANG, Z., LIU, D., PAN, R., LI, Z., HU, Y., LUO, Z., HUANG, P., WU, Q.,  
1475 ZHU, Z., ZHANG, B. & LIN, S. 2013. TALEN-mediated precise genome modification by  
1476 homologous recombination in zebrafish. *Nat Methods*, 10, 329-31.
- 1477

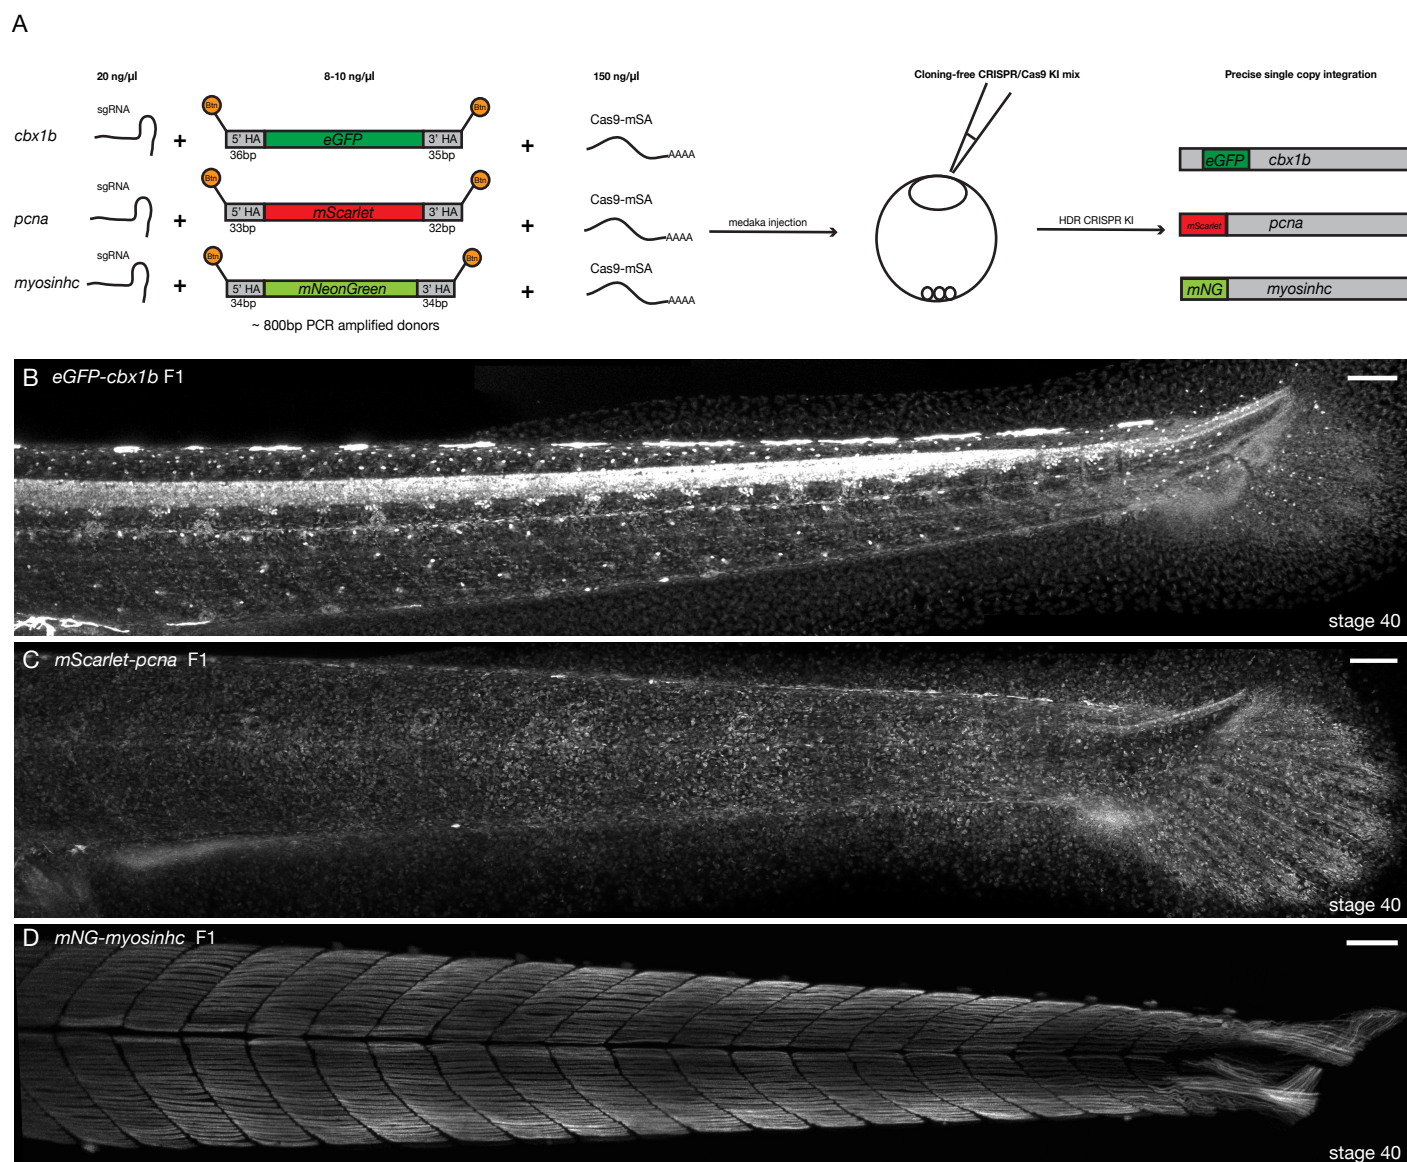

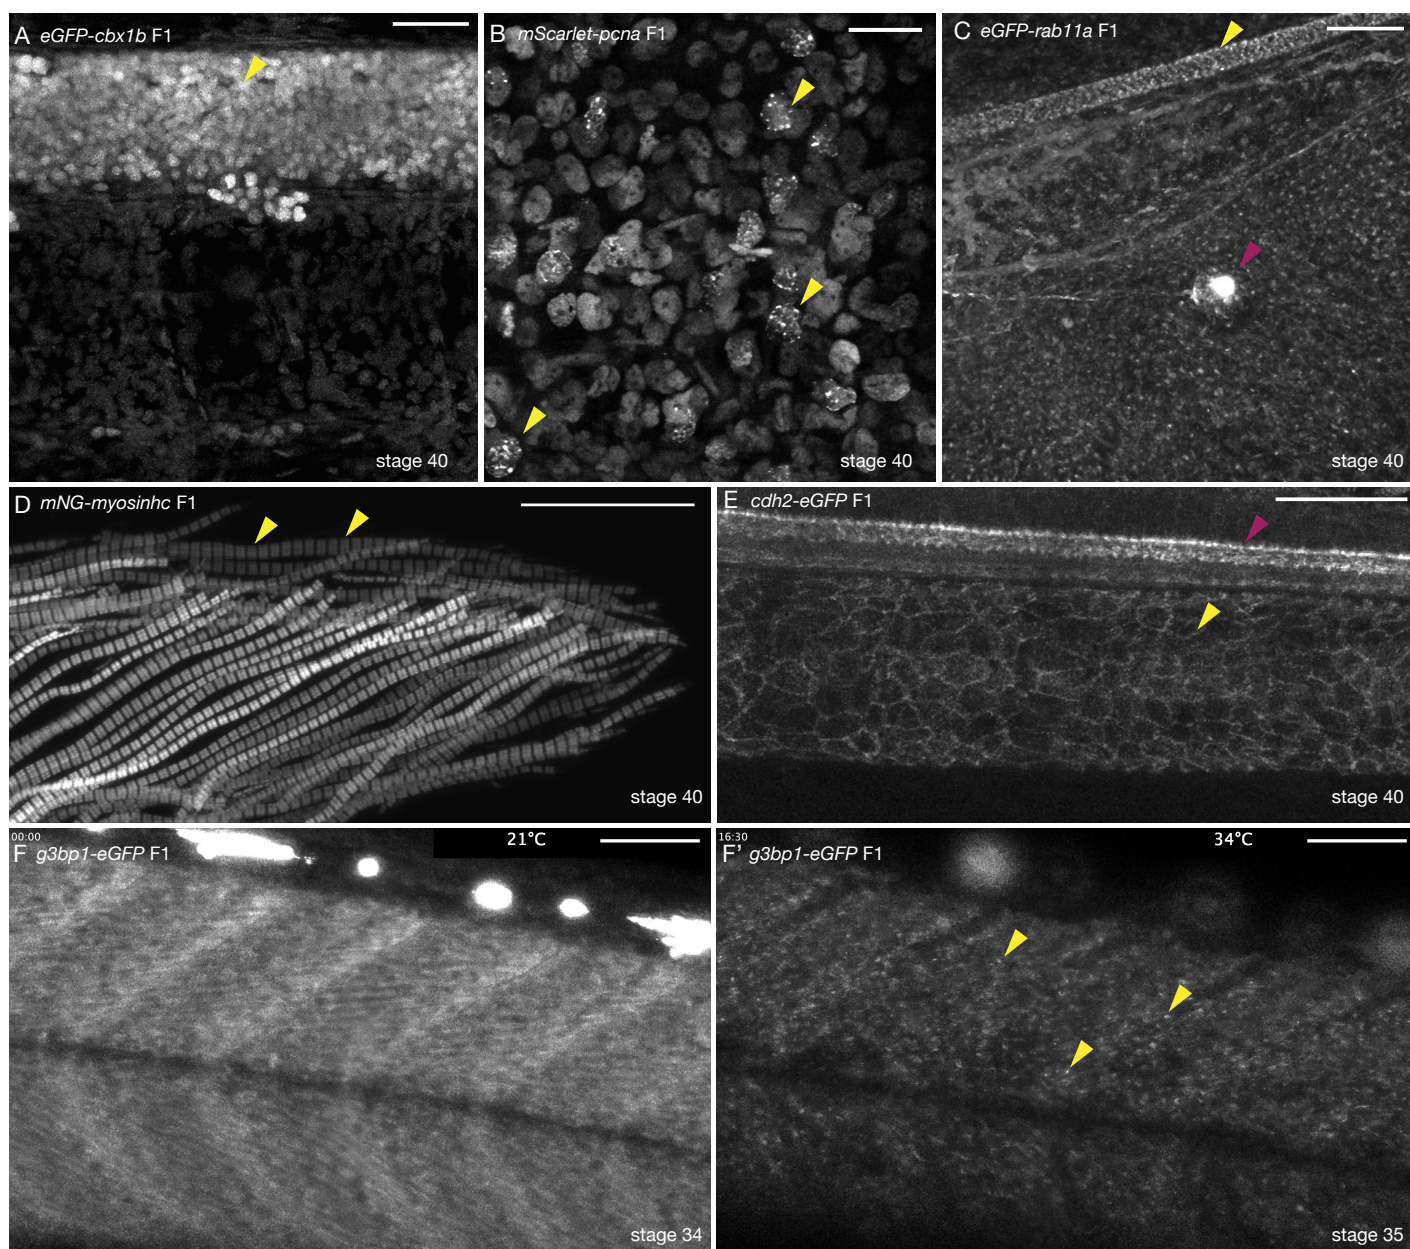

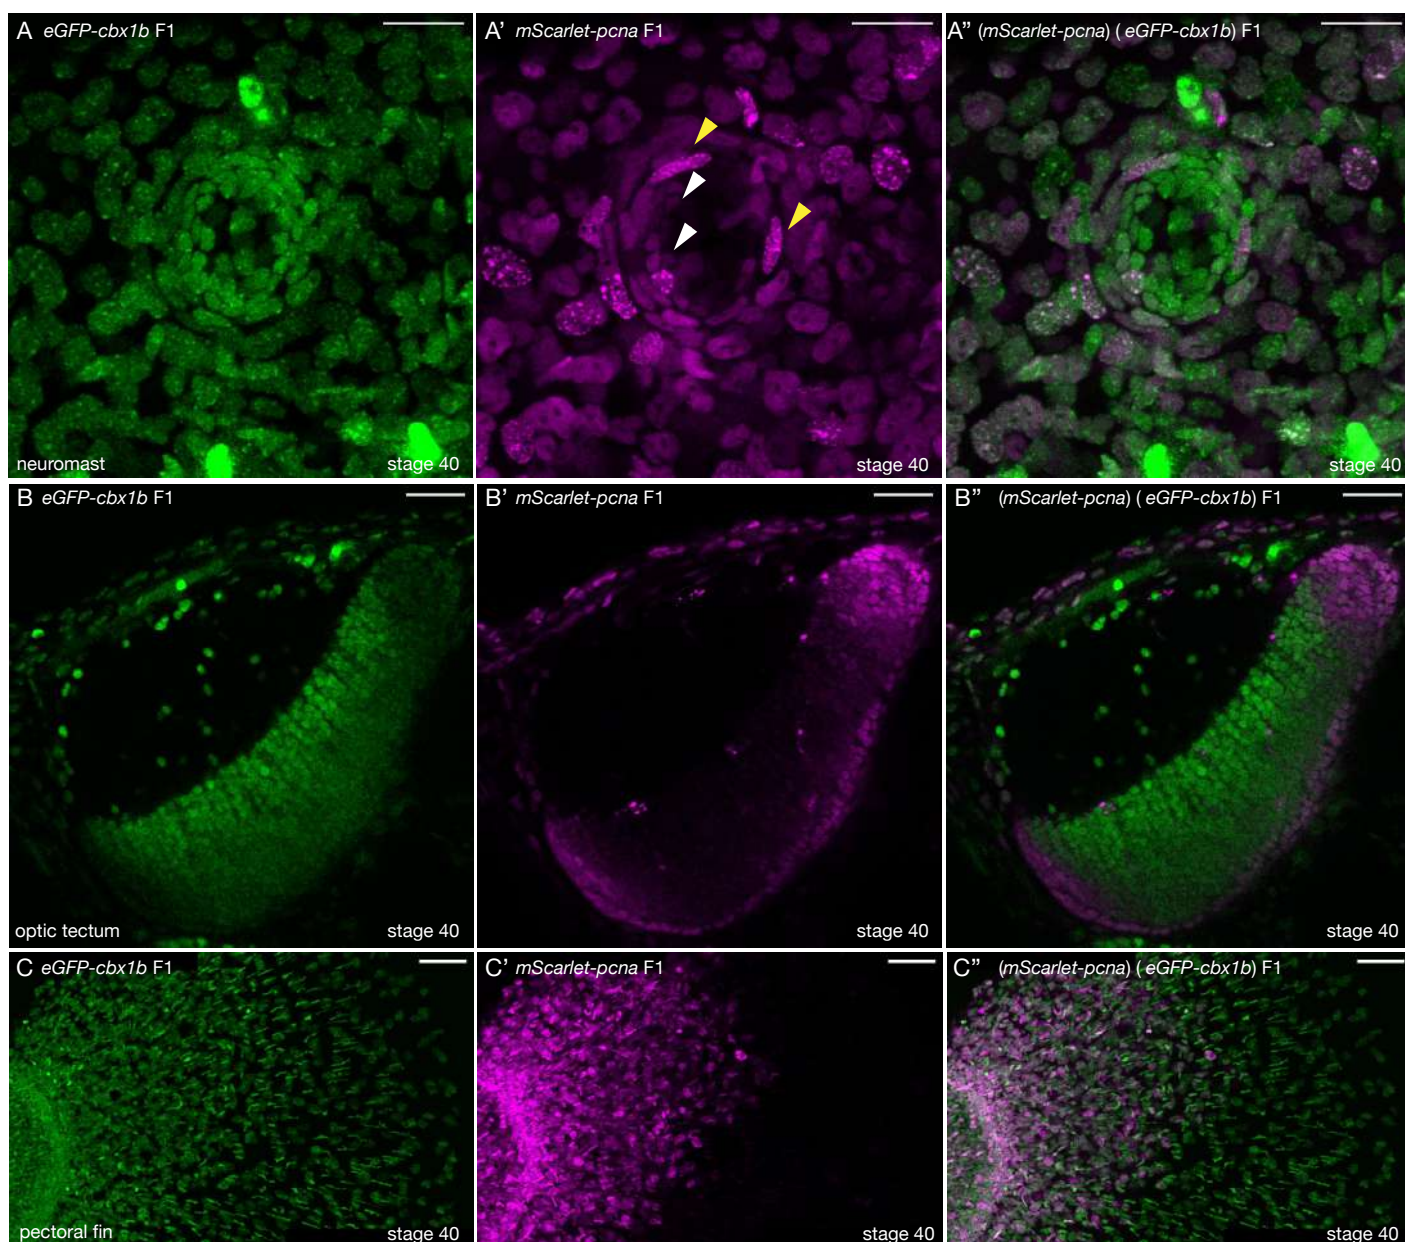

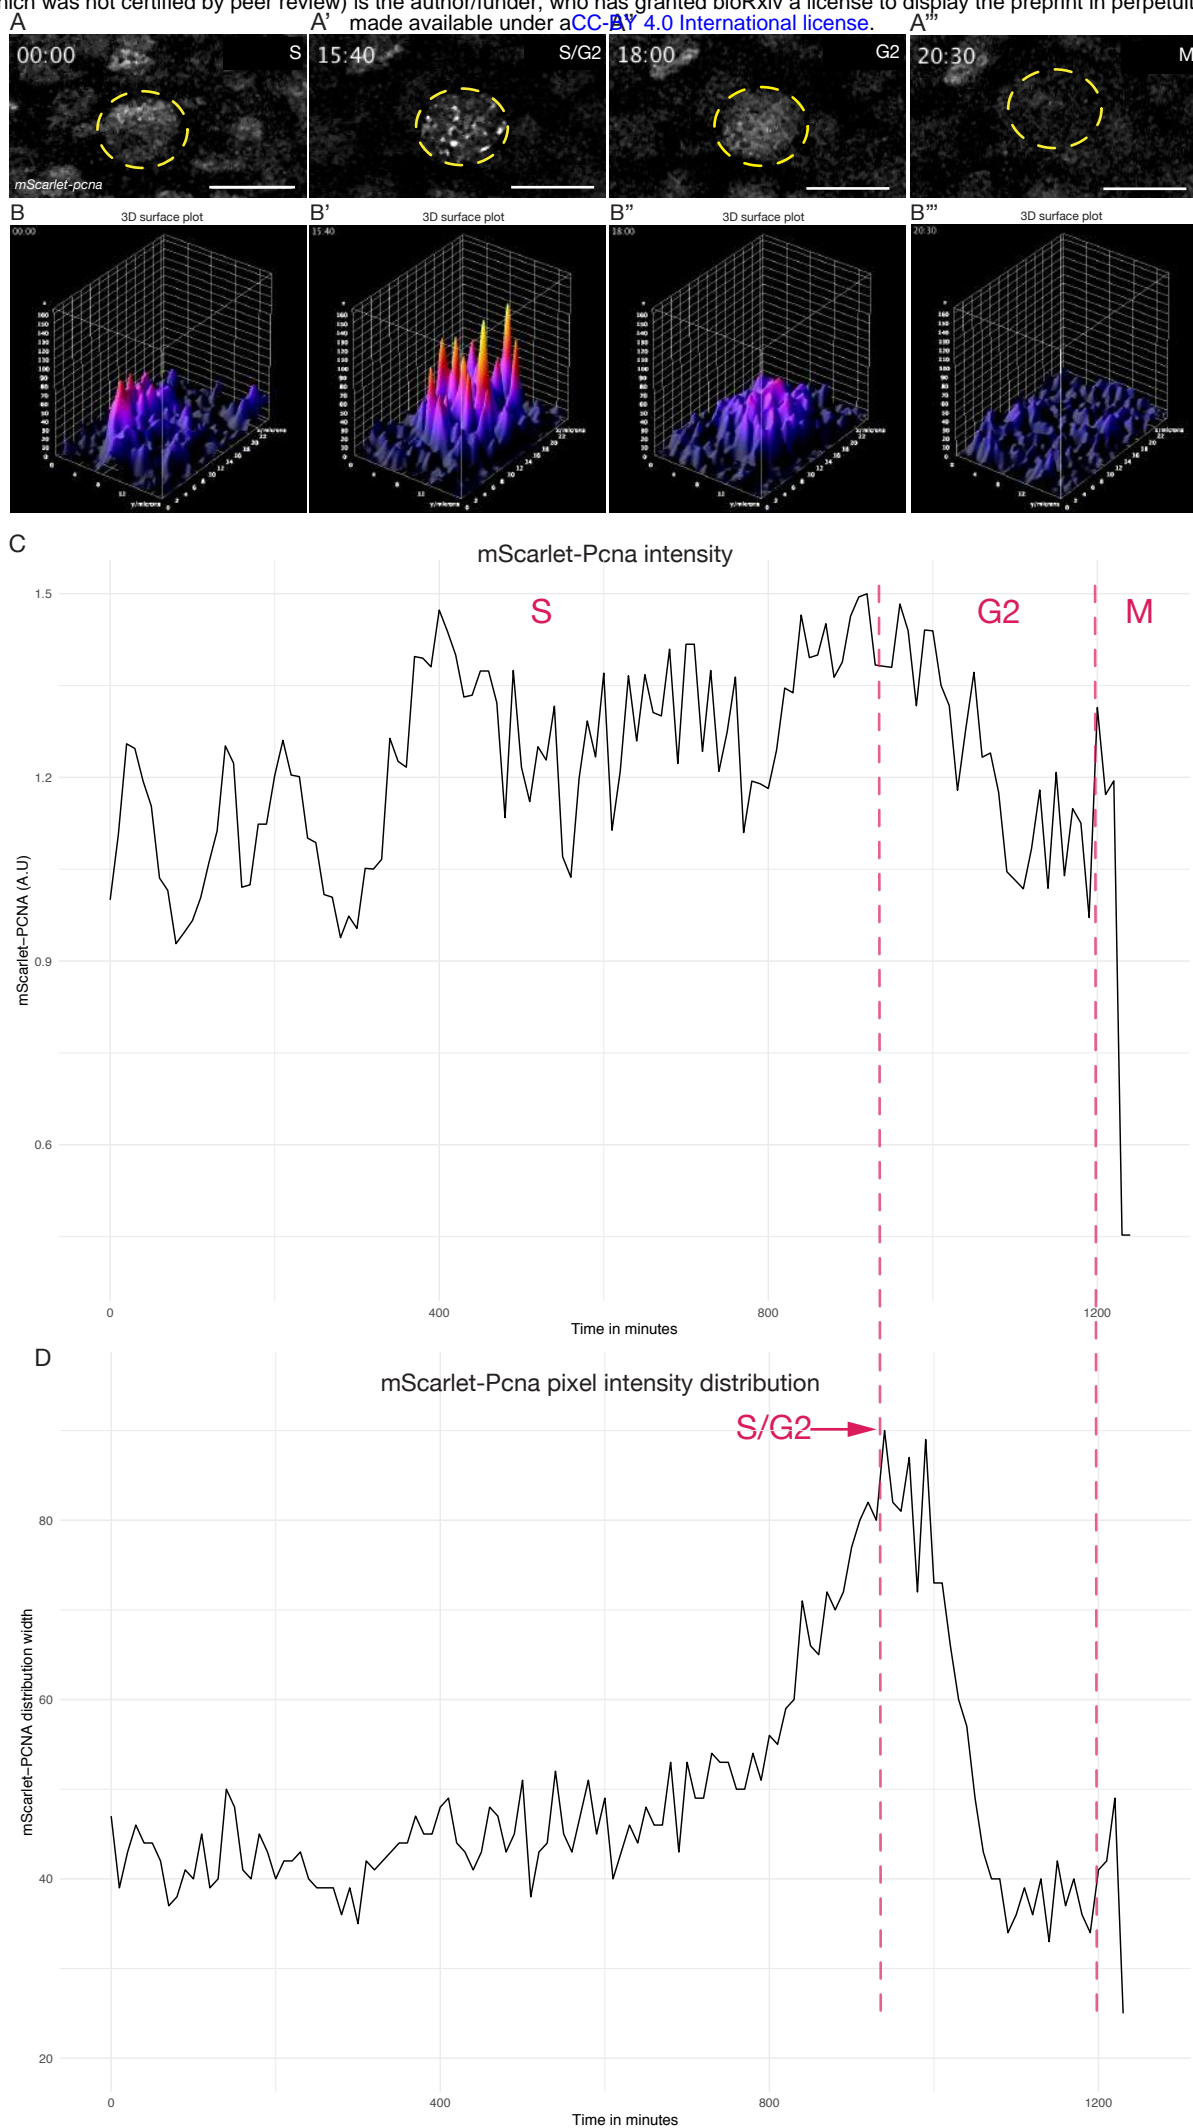

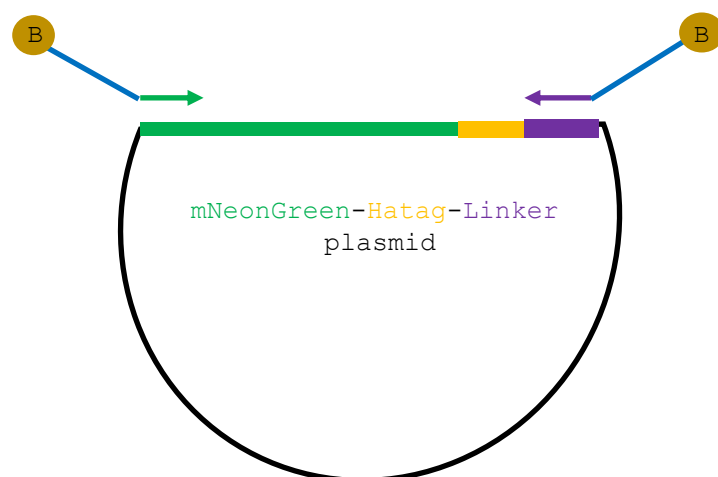

Repair donor  
amplification by PCR

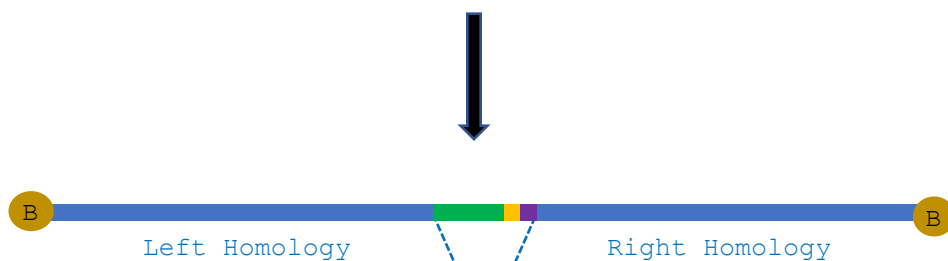

Myosinhc aaataaatcaatgattgtcacccctcatttttagacatctcaagtgtaccATCAGCACTGACGCAGAGATGGAGGCCTATGGCCCTGCGCCATCTACCTCCGGAAC

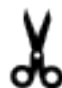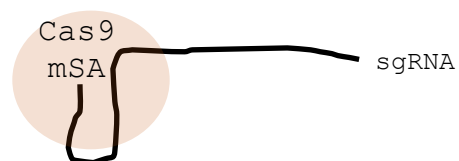

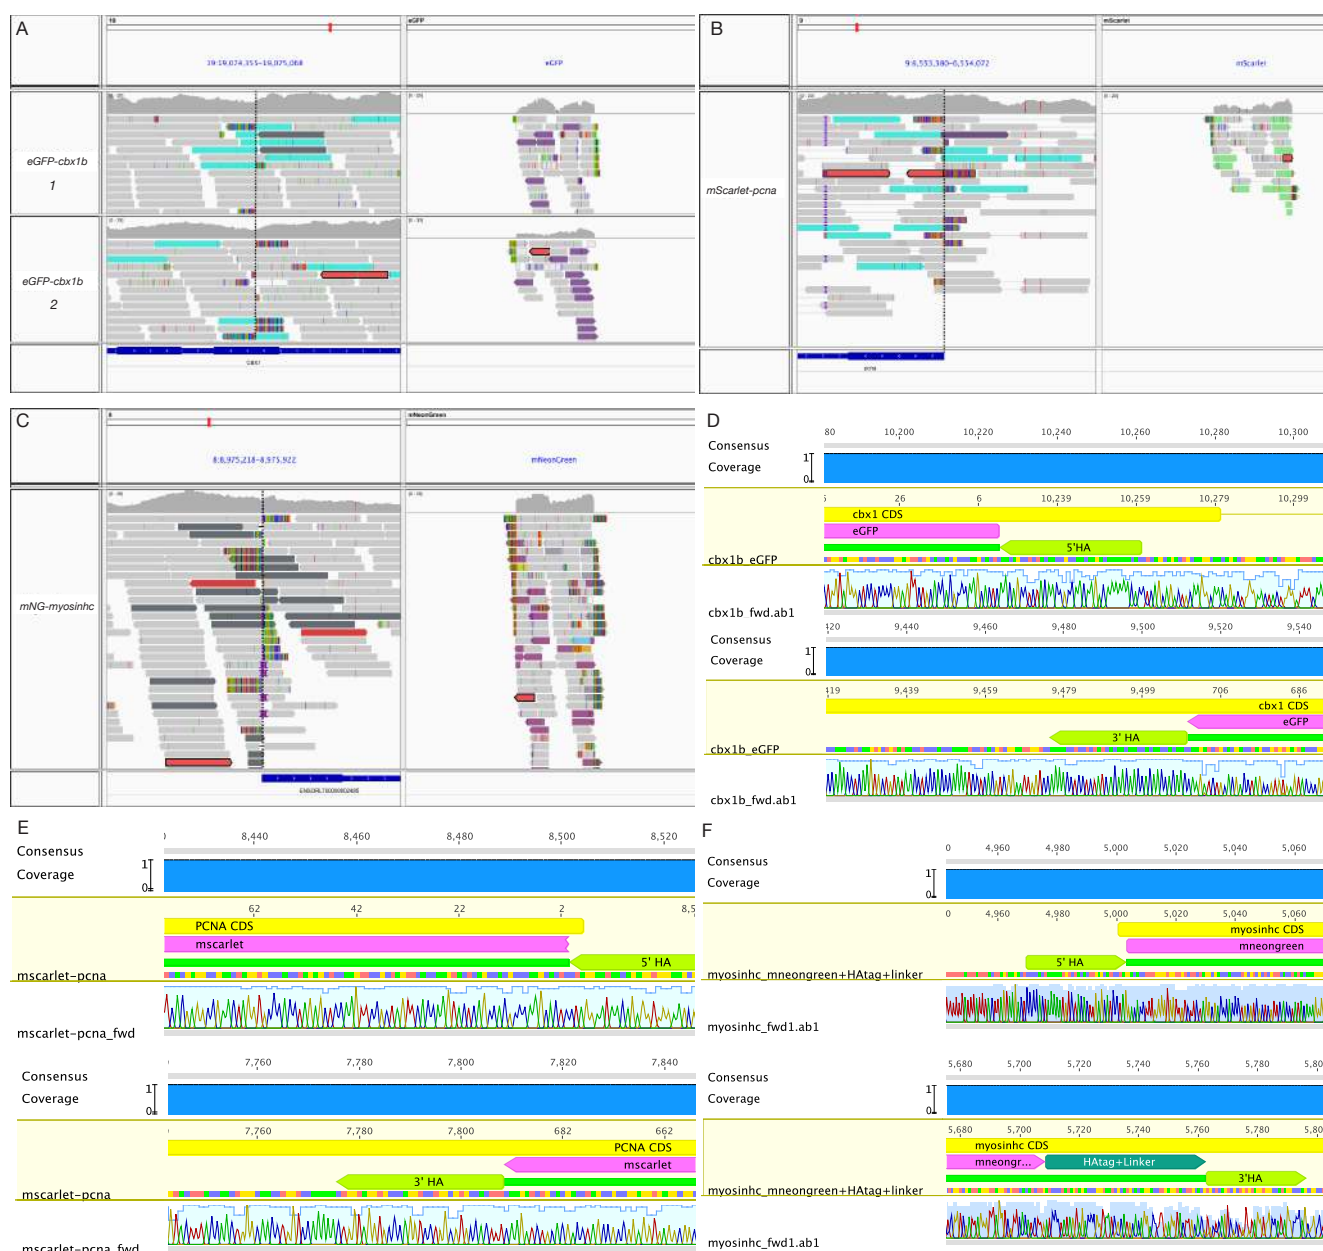

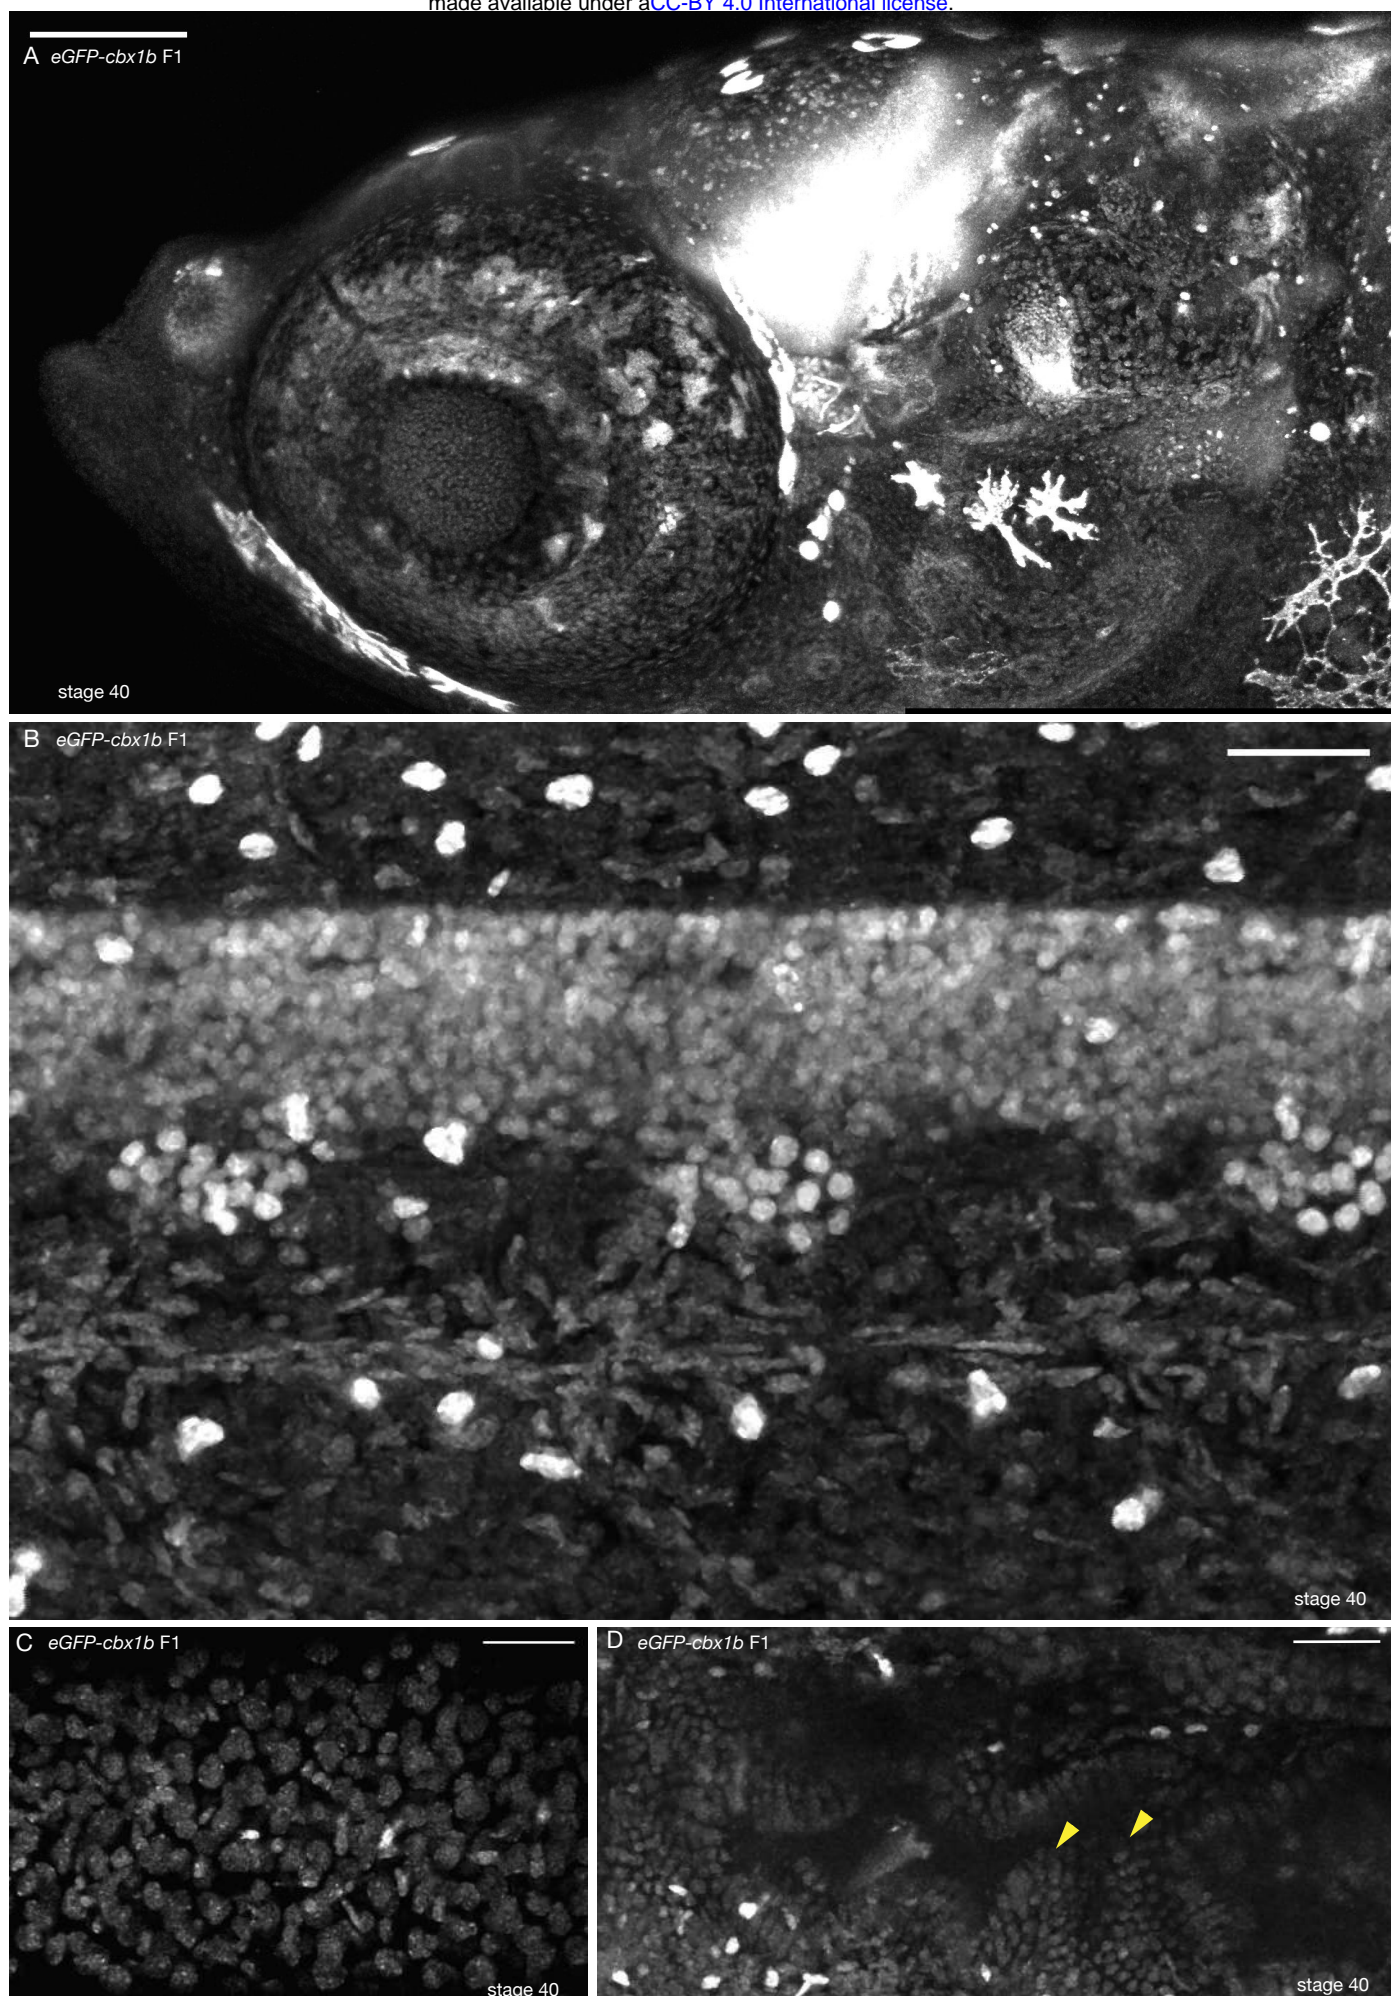



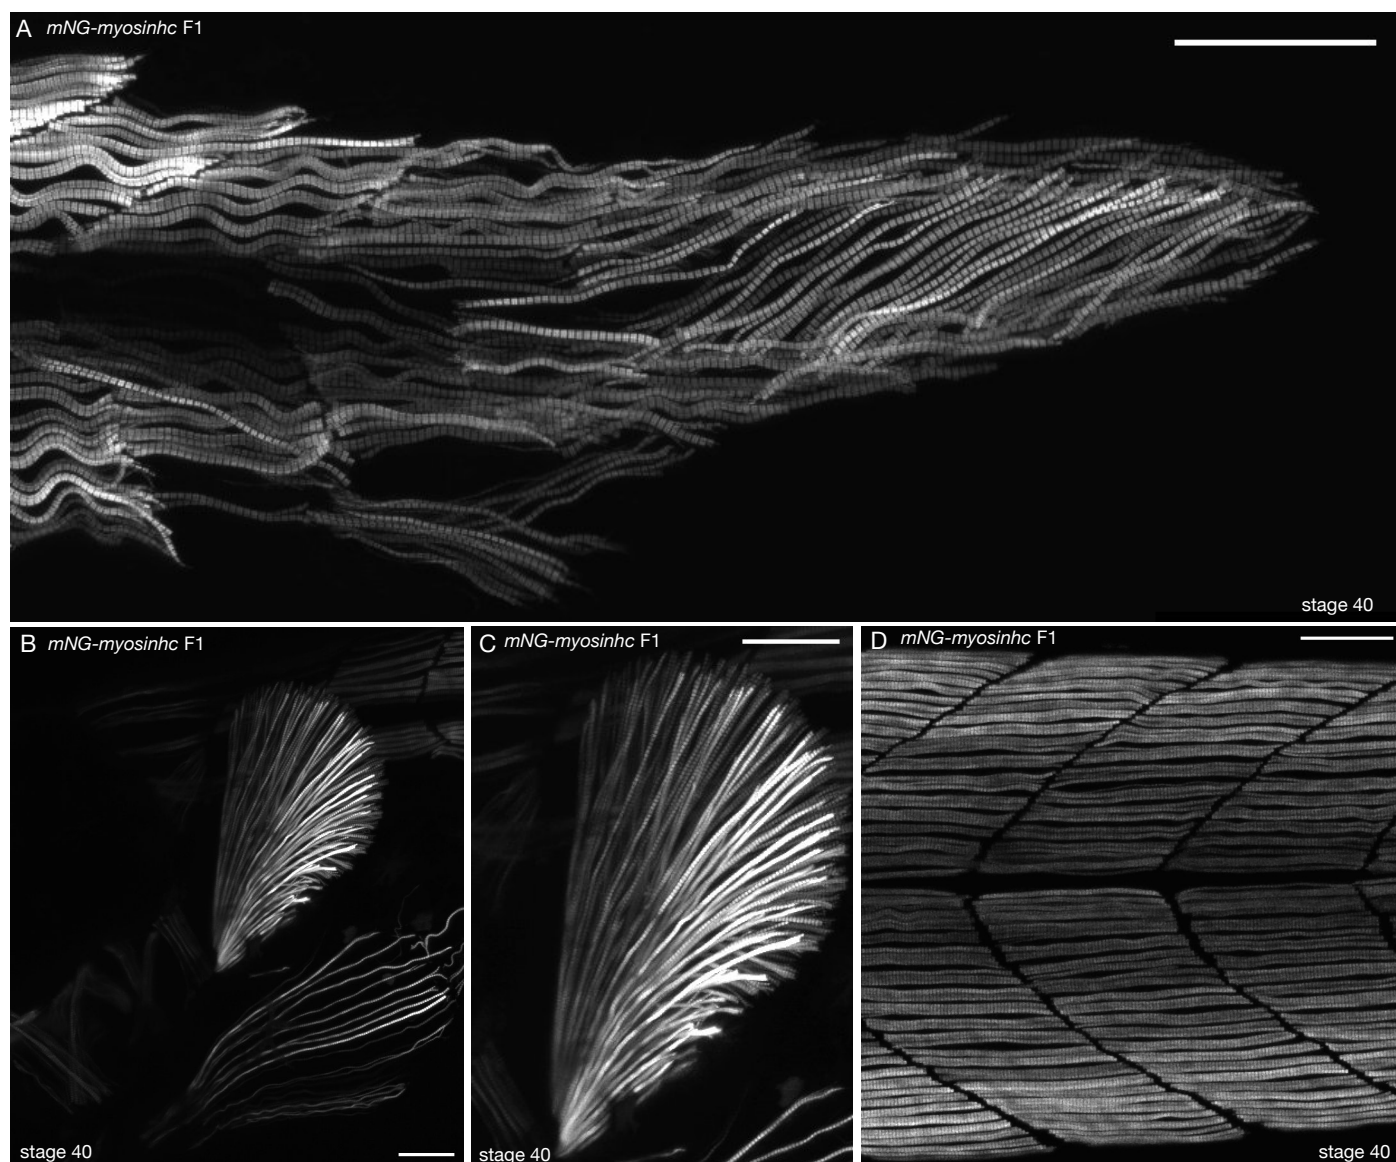

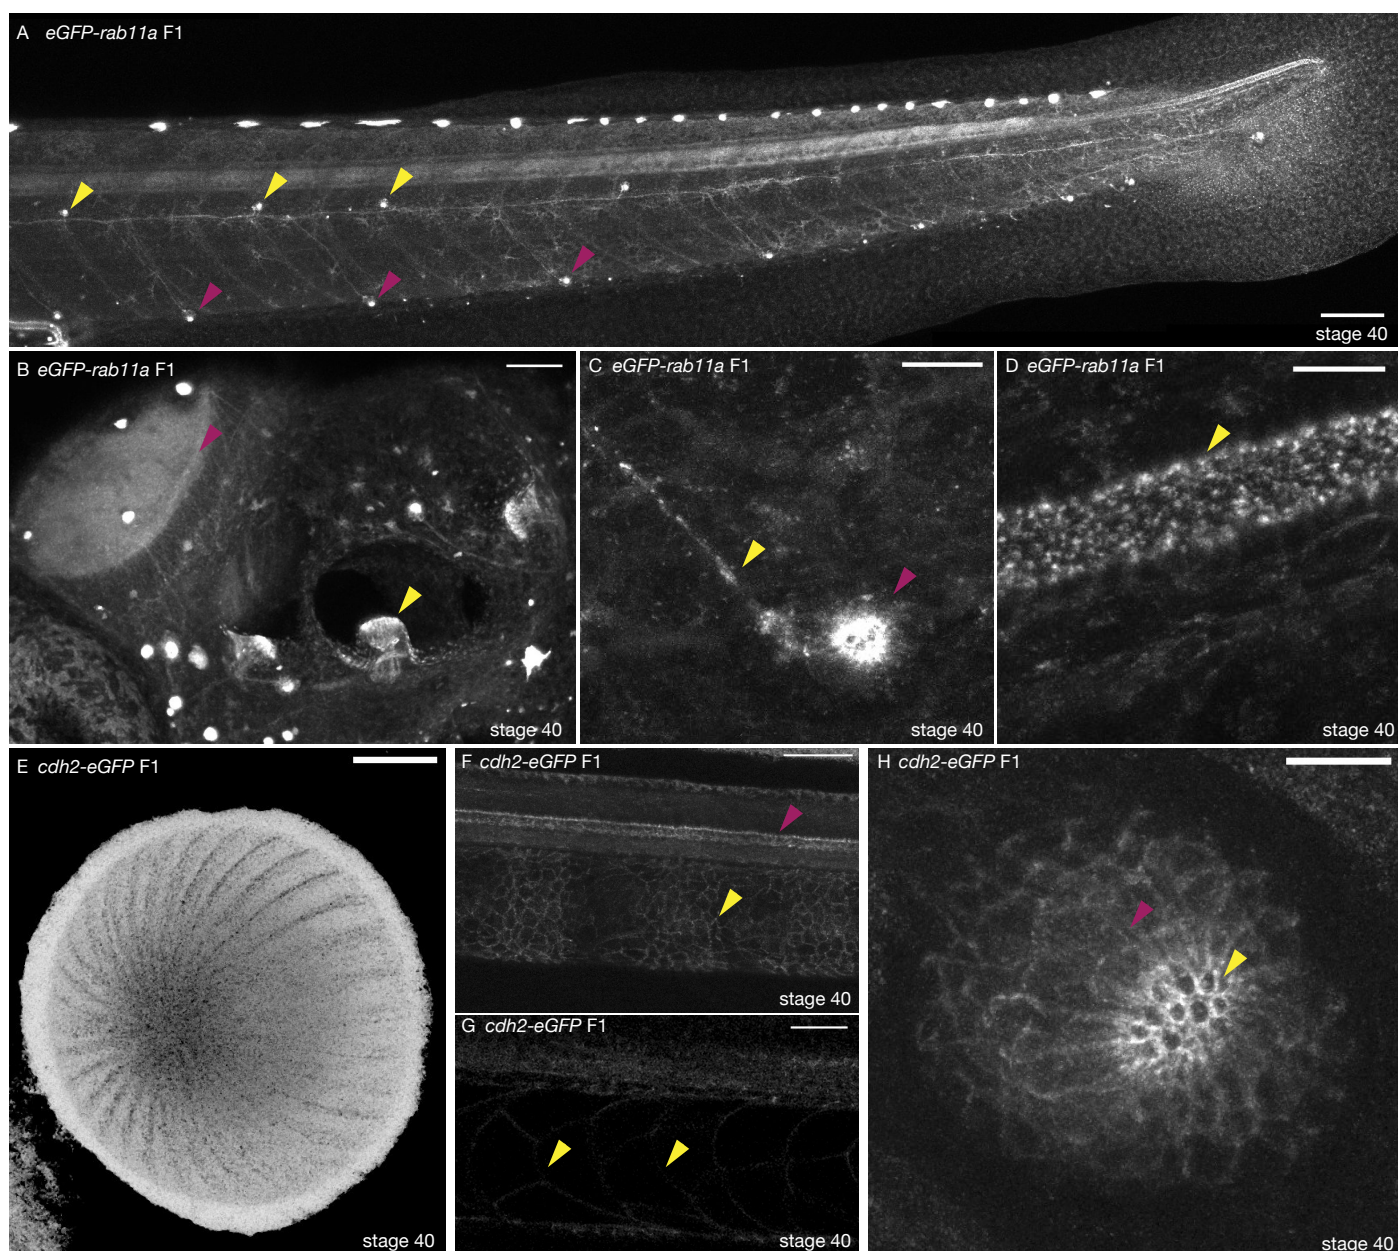

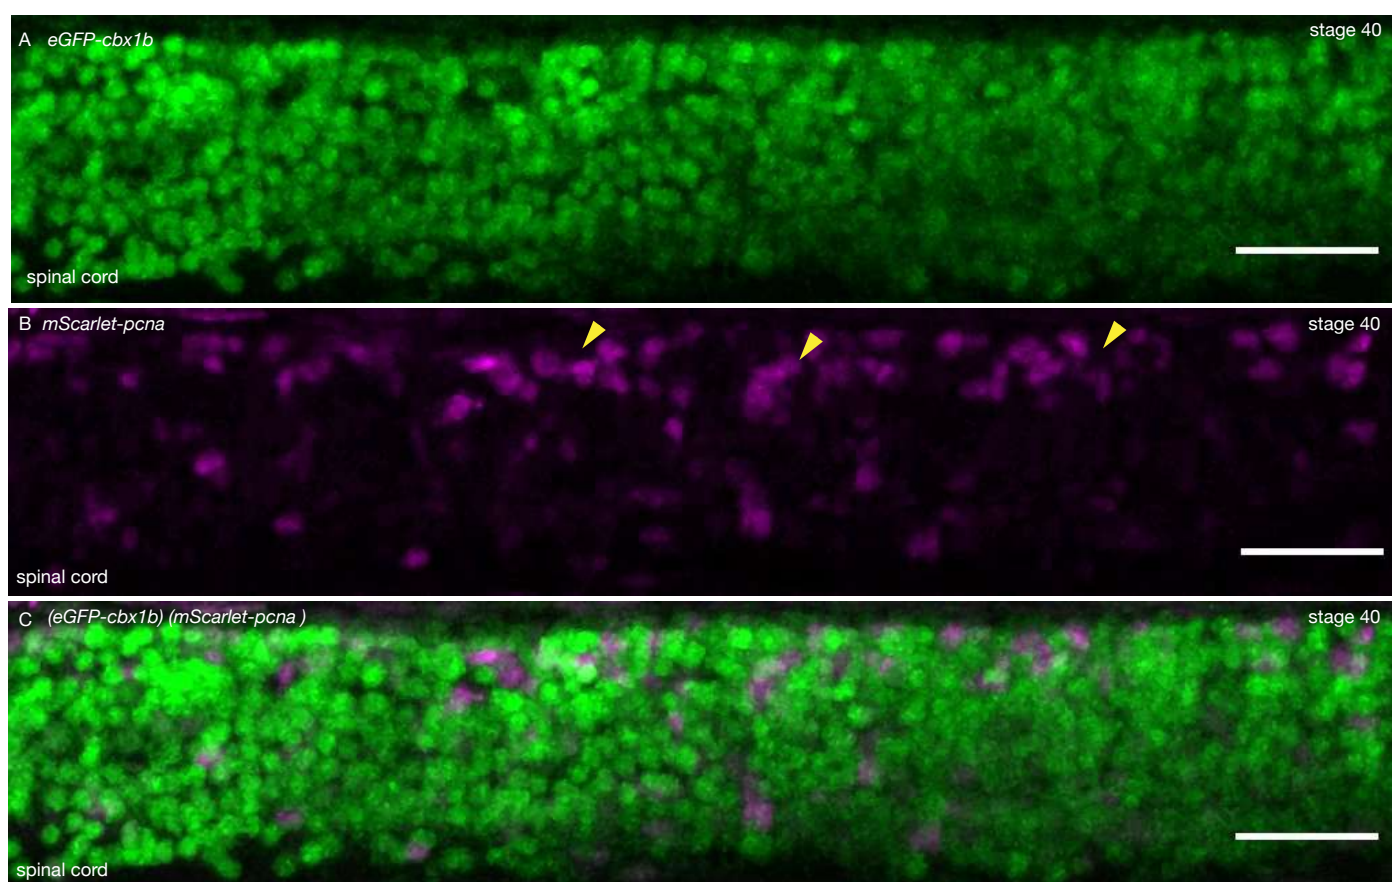

A

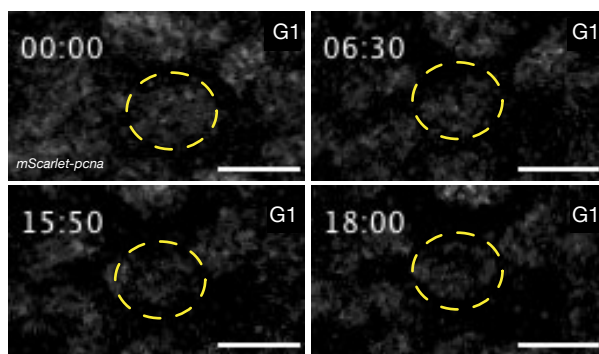

A

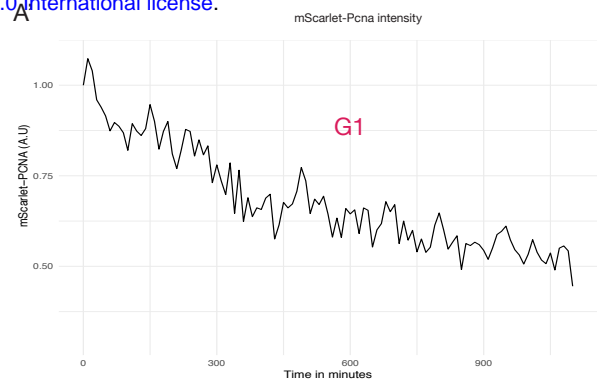

B

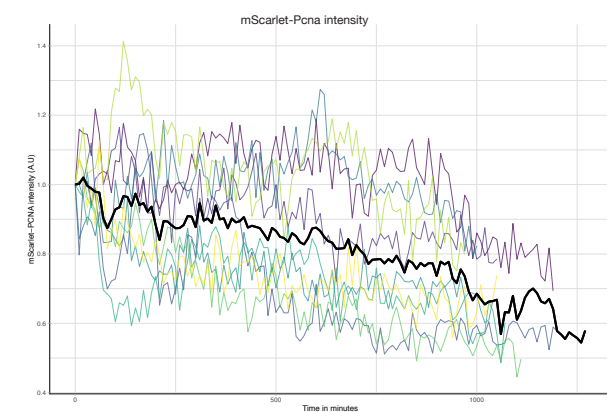

C

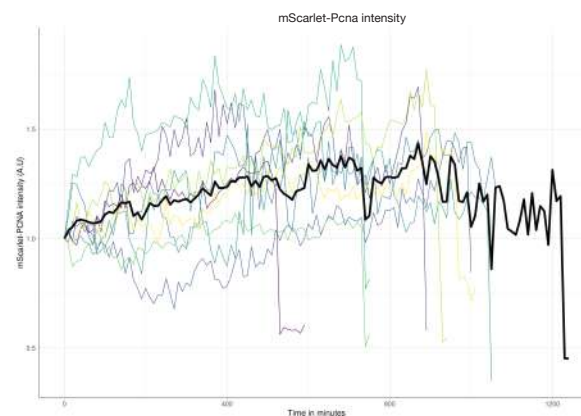

D

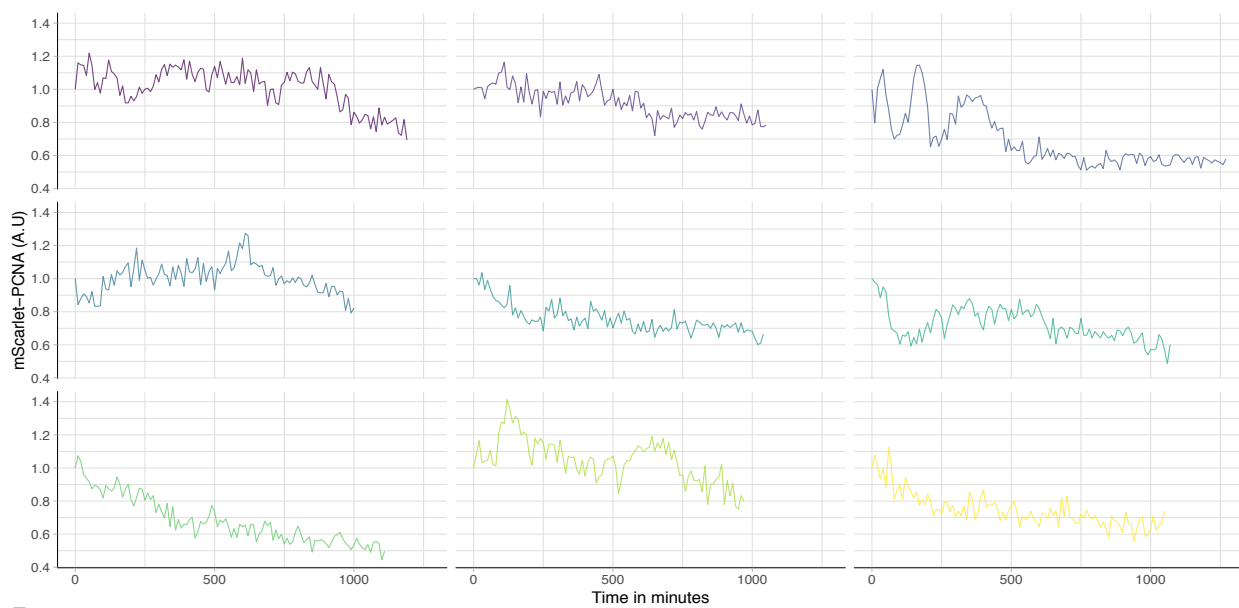

E

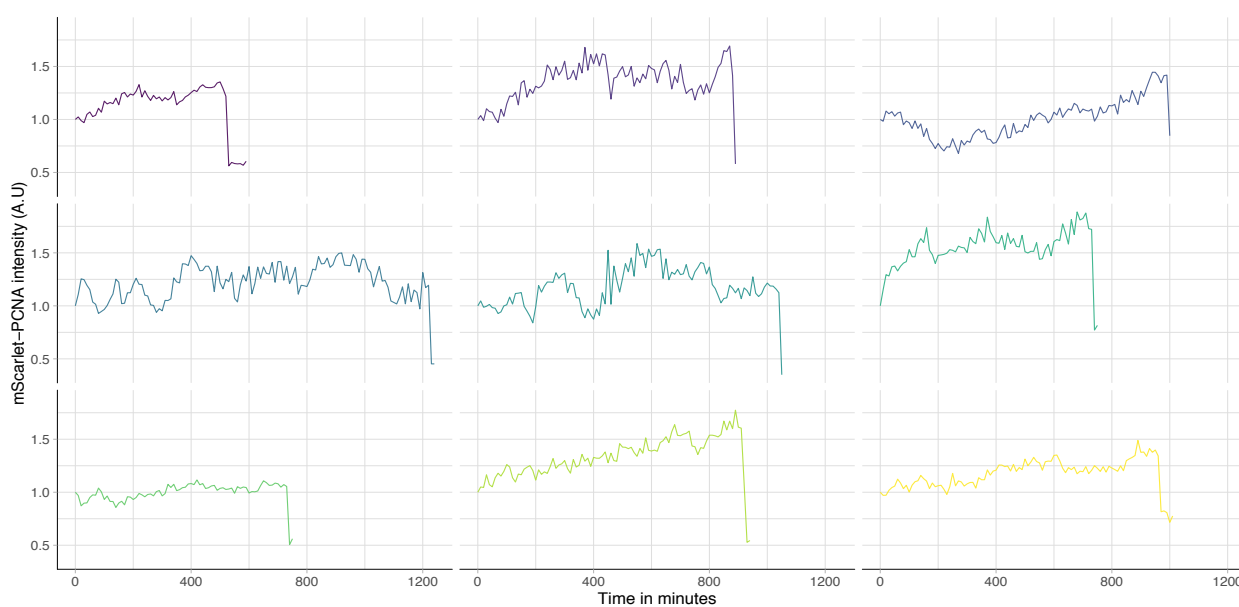

A

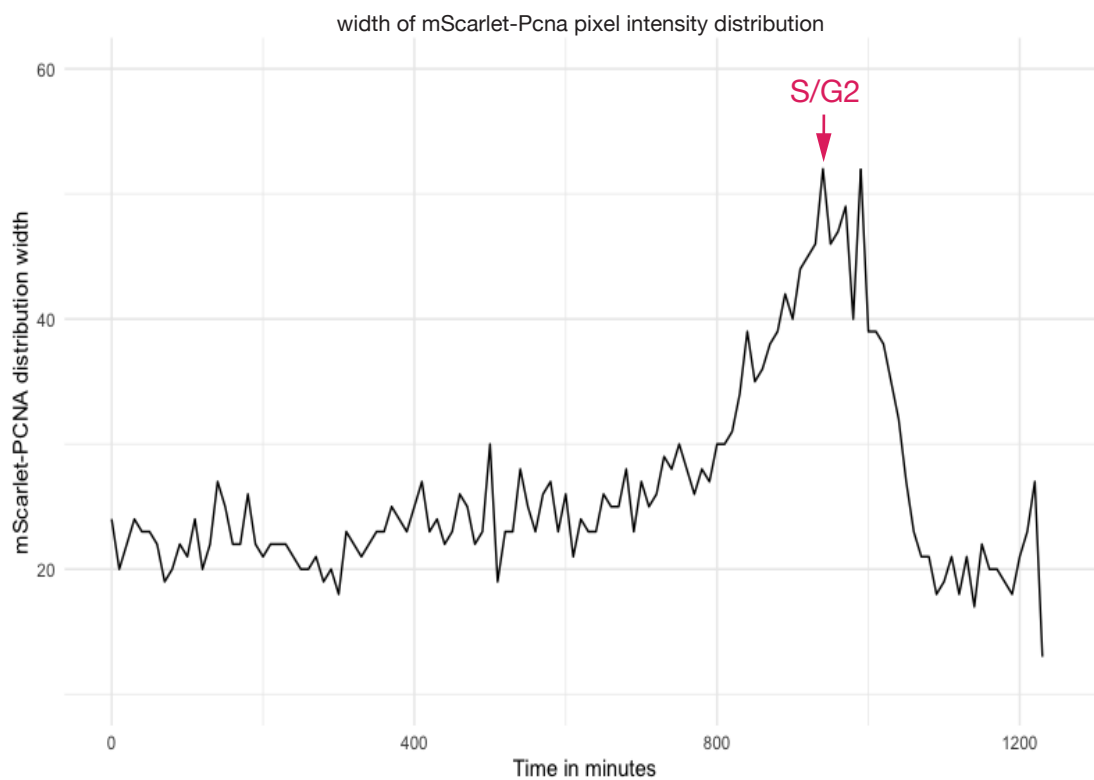

B

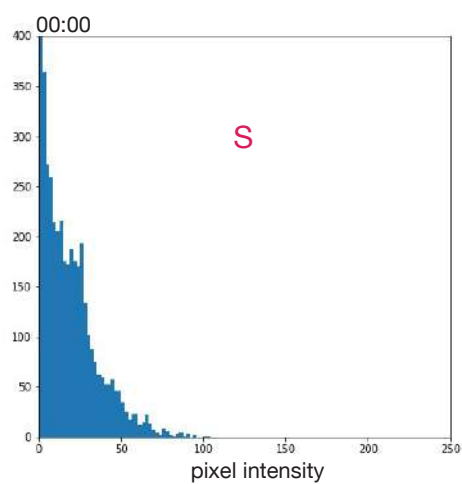

B'

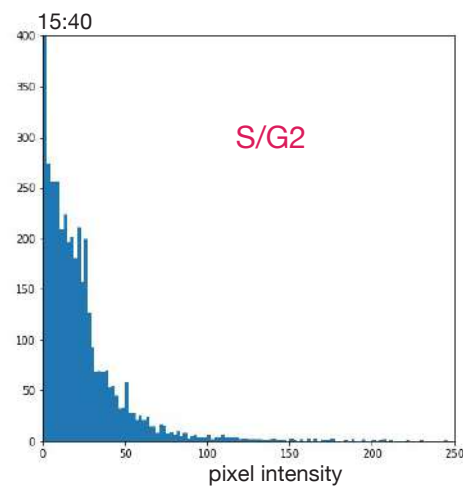

B''

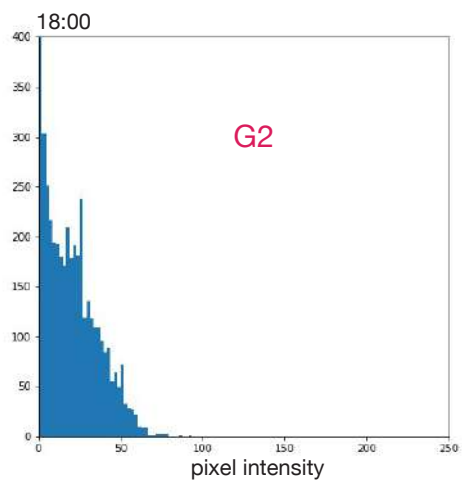

B'''

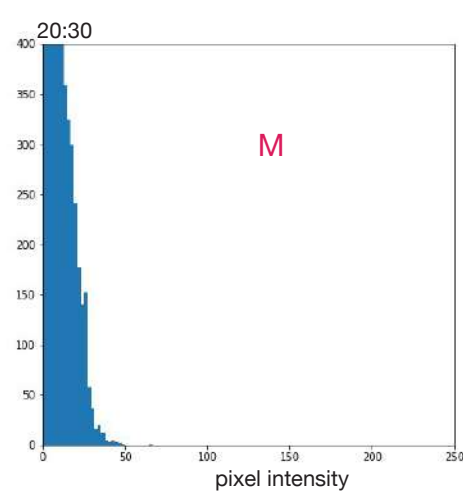

Source: https://www.biorxiv.org/content/10.1101/2021.07.29.454295v1.full.pdf
